# Supplementary material
Source: PubMed Central journal article supplement (PMC3457501)

## **Supplemental material**

TABLE S1 Jaccard's similarity coefficients between any two samples.

TABLE S2 Abundances of all orders in each sample. The abundance is presented in terms of percentages of the total sequences in a sample.

TABLE S3 Abundances of all families in each sample. The abundance is presented in terms of percentages of the total sequences in a sample.

TABLE S4 Rare families within each sample

TABLE S5 Abundances of all genera in each sample. The abundance is presented in terms of percentages of the total sequences in a sample.

Table S6 Rare genera within each sample.

Figure S1 Rarefaction curves of 14 activated sludge samples at cutoff levels of 3% (a) and 5% (b). The rarefaction curve, plotting the number of observed OTUs as a function of the number of sequences, was computed using RDP Pyrosequencing Pipeline Rarefaction tool.

Figure S2 Detrended correspondence analysis (DCA) for 14 activated sludge samples.

Figure S3 FIG 2 Heat map of the 38 core orders in each sample. The core orders were the ones that were commonly shared by all activated sludge samples. The color intensity in each cell shows the percentage of an order in a sample.

Figure S4 Heat map of the 46 core families in each sample. The core families were the ones that were commonly shared by all activated sludge samples. The color intensity in each cell shows the percentage of a family in a sample.

TABLE S1 Jaccard's similarity coefficients between any two samples.

| WWTP | A1   | A2   | B    | C    | D1   | D2   | E1   | E2   | F    | G1   | G2   | H    | I    |
|------|------|------|------|------|------|------|------|------|------|------|------|------|------|
| A2   | 0.55 |      |      |      |      |      |      |      |      |      |      |      |      |
| B    | 0.51 | 0.53 |      |      |      |      |      |      |      |      |      |      |      |
| C    | 0.52 | 0.53 | 0.52 |      |      |      |      |      |      |      |      |      |      |
| D1   | 0.34 | 0.35 | 0.34 | 0.34 |      |      |      |      |      |      |      |      |      |
| D2   | 0.30 | 0.30 | 0.29 | 0.30 | 0.47 |      |      |      |      |      |      |      |      |
| E1   | 0.33 | 0.37 | 0.33 | 0.35 | 0.31 | 0.38 |      |      |      |      |      |      |      |
| E2   | 0.35 | 0.36 | 0.35 | 0.36 | 0.30 | 0.32 | 0.48 |      |      |      |      |      |      |
| F    | 0.25 | 0.25 | 0.25 | 0.24 | 0.28 | 0.22 | 0.28 | 0.24 |      |      |      |      |      |
| G1   | 0.38 | 0.39 | 0.39 | 0.39 | 0.49 | 0.32 | 0.32 | 0.35 | 0.27 |      |      |      |      |
| G2   | 0.30 | 0.29 | 0.30 | 0.30 | 0.33 | 0.21 | 0.21 | 0.21 | 0.26 | 0.44 |      |      |      |
| H    | 0.30 | 0.29 | 0.31 | 0.31 | 0.37 | 0.23 | 0.20 | 0.22 | 0.25 | 0.38 | 0.46 |      |      |
| I    | 0.32 | 0.35 | 0.35 | 0.33 | 0.35 | 0.29 | 0.29 | 0.26 | 0.27 | 0.38 | 0.40 | 0.41 |      |
| J    | 0.23 | 0.22 | 0.24 | 0.23 | 0.29 | 0.21 | 0.28 | 0.24 | 0.26 | 0.29 | 0.33 | 0.37 | 0.35 |

TABLE S2 Abundances of all orders in each sample. The abundance is presented in terms of percentages of the total sequences in a sample.

| WWTP                 | A1    | A2    | B     | C     | D1    | D2    | E1    | E2    | F     | G1   | G2    | H     | I     | J     |
|----------------------|-------|-------|-------|-------|-------|-------|-------|-------|-------|------|-------|-------|-------|-------|
| Fusobacteriales      | 0.26  | 0.16  | 0.16  | 0.30  | 0.68  | 0.96  | 0.07  | 0.01  | 0.05  | 0.02 | 0.04  | 0.12  | 0.08  | 0.10  |
| Caldisericales       | 0.00  | 0.00  | 0.00  | 0.00  | 0.00  | 0.00  | 0.00  | 0.00  | 0.00  | 0.00 | 0.00  | 0.00  | 0.00  | 0.01  |
| Acidimicrobiales     | 0.05  | 0.03  | 0.16  | 0.06  | 0.04  | 0.06  | 0.54  | 0.15  | 0.16  | 0.66 | 0.66  | 0.64  | 0.59  | 0.62  |
| Rubrobaetales        | 0.00  | 0.00  | 0.00  | 0.00  | 0.00  | 0.00  | 0.00  | 0.00  | 0.00  | 0.00 | 0.01  | 0.00  | 0.00  | 0.00  |
| Solirubrobaetales    | 0.03  | 0.00  | 0.02  | 0.02  | 0.00  | 0.07  | 0.00  | 0.06  | 0.19  | 0.33 | 0.43  | 0.35  | 0.33  | 0.40  |
| Actinomycetales      | 0.20  | 0.25  | 0.48  | 0.21  | 0.21  | 0.17  | 0.19  | 0.15  | 0.12  | 0.20 | 0.52  | 0.42  | 0.44  | 0.42  |
| Bifidobacteriales    | 0.12  | 0.37  | 0.32  | 0.34  | 0.03  | 0.20  | 0.29  | 0.07  | 0.21  | 0.02 | 0.04  | 0.07  | 0.11  | 0.23  |
| Coriobacteriales     | 0.00  | 0.00  | 0.00  | 0.00  | 0.00  | 0.00  | 0.02  | 0.00  | 0.00  | 0.02 | 0.00  | 0.00  | 0.01  | 0.01  |
| Spirochaetales       | 0.95  | 0.16  | 0.73  | 0.98  | 0.61  | 0.87  | 0.58  | 0.04  | 0.12  | 0.09 | 0.14  | 0.12  | 0.11  | 0.29  |
| Bacteroidales        | 2.78  | 0.53  | 1.15  | 2.56  | 3.12  | 0.67  | 1.04  | 0.43  | 0.40  | 0.65 | 1.79  | 1.77  | 1.73  | 2.29  |
| Sphingobacteriales   | 37.79 | 11.76 | 17.23 | 39.84 | 41.52 | 15.01 | 11.51 | 65.48 | 14.29 | 9.54 | 18.52 | 18.03 | 17.61 | 18.90 |
| Flavobacteriales     | 7.74  | 2.17  | 2.29  | 5.08  | 4.01  | 1.76  | 1.99  | 1.35  | 1.28  | 0.30 | 1.51  | 1.33  | 1.39  | 1.44  |
| Campylobacteriales   | 0.49  | 0.00  | 0.09  | 0.52  | 0.21  | 0.26  | 0.03  | 0.01  | 0.00  | 0.00 | 0.06  | 0.01  | 0.03  | 0.03  |
| Syntrophobacteriales | 0.03  | 0.03  | 0.02  | 0.00  | 0.01  | 0.02  | 0.07  | 0.05  | 0.05  | 0.07 | 0.01  | 0.10  | 0.11  | 0.09  |
| Desulfovibrionales   | 0.19  | 0.03  | 0.18  | 0.11  | 0.21  | 0.11  | 0.07  | 0.00  | 0.02  | 0.18 | 0.08  | 0.03  | 0.04  | 0.03  |
| Bdellovibrionales    | 0.56  | 0.96  | 0.41  | 0.63  | 0.28  | 0.71  | 0.12  | 0.05  | 0.28  | 0.09 | 0.23  | 0.25  | 0.23  | 0.22  |
| Desulfuromonadales   | 0.07  | 0.06  | 0.16  | 0.09  | 0.07  | 0.02  | 0.12  | 0.00  | 0.09  | 0.04 | 0.03  | 0.01  | 0.04  | 0.01  |
| Desulfobacteriales   | 0.20  | 0.06  | 0.55  | 0.18  | 0.23  | 0.45  | 0.19  | 0.04  | 0.26  | 0.15 | 0.23  | 0.25  | 0.18  | 0.24  |
| Myxococcales         | 3.48  | 2.54  | 4.12  | 5.18  | 3.03  | 9.50  | 5.57  | 0.86  | 2.12  | 4.95 | 2.01  | 1.97  | 1.51  | 1.93  |
| Nitrosomonadales     | 0.41  | 1.40  | 0.44  | 0.08  | 0.00  | 0.22  | 0.27  | 0.07  | 1.47  | 0.09 | 0.43  | 0.48  | 0.41  | 0.29  |
| Burkholderiales      | 2.40  | 4.40  | 6.92  | 4.15  | 4.43  | 7.94  | 14.42 | 4.49  | 6.91  | 7.94 | 3.96  | 4.72  | 3.71  | 2.61  |
| Hydrogenophilales    | 0.07  | 0.00  | 0.00  | 0.00  | 0.00  | 0.00  | 0.00  | 0.02  | 0.33  | 0.04 | 0.08  | 0.03  | 0.06  | 0.01  |
| Methylophilales      | 0.00  | 0.00  | 0.00  | 0.56  | 0.11  | 0.02  | 0.00  | 0.00  | 0.00  | 0.00 | 0.22  | 0.16  | 0.18  | 0.01  |
| Neisseriales         | 0.20  | 0.31  | 0.34  | 0.02  | 0.07  | 0.09  | 0.49  | 0.14  | 2.68  | 0.37 | 0.28  | 0.45  | 0.14  | 0.12  |



|                        |      |       |      |      |       |       |       |      |       |       |       |       |       |       |
|------------------------|------|-------|------|------|-------|-------|-------|------|-------|-------|-------|-------|-------|-------|
| Ignavibacteriales      | 0.05 | 1.05  | 0.09 | 0.27 | 0.33  | 0.06  | 0.89  | 0.07 | 3.49  | 1.73  | 0.59  | 0.41  | 0.48  | 0.69  |
| Holophagales           | 0.10 | 0.00  | 0.09 | 0.00 | 0.04  | 0.07  | 0.03  | 0.09 | 0.35  | 0.09  | 0.01  | 0.01  | 0.04  | 0.07  |
| Natranaerobiales       | 0.00 | 0.00  | 0.00 | 0.00 | 0.00  | 0.00  | 0.00  | 0.00 | 0.00  | 0.00  | 0.01  | 0.00  | 0.00  | 0.00  |
| Clostridiales          | 3.51 | 1.05  | 2.52 | 1.49 | 1.23  | 1.86  | 4.43  | 0.53 | 1.56  | 0.46  | 9.19  | 9.80  | 9.46  | 11.47 |
| Thermoanaerobacterales | 0.00 | 0.00  | 0.00 | 0.00 | 0.00  | 0.00  | 0.00  | 0.00 | 0.00  | 0.00  | 0.00  | 0.01  | 0.03  | 0.01  |
| Lactobacillales        | 0.67 | 0.28  | 0.89 | 0.34 | 2.27  | 0.63  | 0.43  | 0.30 | 0.47  | 2.88  | 0.96  | 0.87  | 0.89  | 0.94  |
| Bacillales             | 0.72 | 1.24  | 0.66 | 0.63 | 0.42  | 0.19  | 0.26  | 0.52 | 3.44  | 2.75  | 1.43  | 1.33  | 1.40  | 1.55  |
| Erysipelotrichales     | 0.09 | 0.00  | 0.02 | 0.06 | 0.00  | 0.02  | 0.00  | 0.01 | 0.02  | 0.04  | 0.00  | 0.03  | 0.06  | 0.07  |
| Deinococcales          | 0.00 | 0.03  | 0.00 | 0.00 | 0.01  | 0.00  | 0.00  | 0.00 | 0.02  | 0.00  | 0.01  | 0.01  | 0.03  | 0.03  |
| Thermales              | 0.00 | 0.00  | 0.00 | 0.00 | 0.03  | 0.02  | 0.00  | 0.02 | 0.00  | 0.00  | 0.01  | 0.00  | 0.00  | 0.00  |
| Synergistales          | 0.19 | 0.09  | 0.34 | 0.11 | 0.16  | 0.15  | 0.19  | 0.11 | 0.09  | 0.15  | 0.72  | 0.84  | 0.88  | 1.11  |
| Puniceicoccales        | 0.00 | 0.00  | 0.00 | 0.00 | 0.00  | 0.00  | 0.00  | 0.00 | 0.00  | 0.04  | 0.00  | 0.00  | 0.00  | 0.01  |
| Opitutales             | 0.43 | 1.67  | 0.41 | 0.90 | 0.31  | 0.67  | 0.27  | 0.02 | 0.07  | 0.02  | 0.07  | 0.04  | 0.14  | 0.12  |
| Verrucomicrobiales     | 1.52 | 10.48 | 3.85 | 8.36 | 10.21 | 11.62 | 7.47  | 0.22 | 8.59  | 1.51  | 1.82  | 2.20  | 2.23  | 2.22  |
| Planctomycetales       | 2.46 | 11.29 | 3.34 | 2.26 | 1.05  | 1.43  | 1.29  | 1.08 | 10.14 | 8.53  | 2.64  | 3.04  | 2.56  | 2.94  |
| Phycisphaerales        | 0.00 | 1.49  | 0.00 | 0.02 | 0.00  | 0.02  | 0.00  | 0.00 | 0.28  | 0.15  | 0.04  | 0.03  | 0.01  | 0.04  |
| Victivallales          | 0.03 | 0.00  | 0.00 | 0.00 | 0.01  | 0.00  | 0.00  | 0.00 | 0.00  | 0.00  | 0.01  | 0.00  | 0.01  | 0.00  |
| Anaerolineales         | 3.22 | 0.71  | 8.18 | 7.97 | 3.72  | 8.52  | 11.53 | 4.67 | 4.40  | 21.22 | 27.10 | 23.49 | 28.11 | 26.77 |
| Sphaerobacterales      | 0.00 | 0.00  | 0.00 | 0.00 | 0.00  | 0.00  | 0.00  | 0.00 | 0.00  | 0.00  | 0.00  | 0.01  | 0.00  | 0.01  |
| Caldilineales          | 0.29 | 0.65  | 1.15 | 0.95 | 1.74  | 0.33  | 0.32  | 0.22 | 0.86  | 2.95  | 1.09  | 1.22  | 1.17  | 1.61  |
| Chlamydiales           | 0.97 | 1.46  | 0.55 | 0.61 | 0.30  | 0.74  | 0.49  | 0.15 | 3.51  | 2.03  | 0.56  | 0.83  | 0.59  | 0.59  |
| Methanobacteriales     | 0.00 | 0.00  | 0.00 | 0.00 | 0.00  | 0.00  | 0.00  | 0.01 | 0.00  | 0.02  | 0.00  | 0.00  | 0.00  | 0.01  |
| Methanosarcinales      | 0.02 | 0.00  | 0.00 | 0.00 | 0.00  | 0.00  | 0.00  | 0.00 | 0.00  | 0.00  | 0.03  | 0.01  | 0.07  | 0.06  |
| Methanomicrobiales     | 0.09 | 0.09  | 0.07 | 0.05 | 0.01  | 0.06  | 0.03  | 0.04 | 0.07  | 0.20  | 0.22  | 0.33  | 0.56  | 0.52  |

---

TABLE S3 Abundances of all families in each sample. The abundance is presented in terms of percentages of the total sequences in a sample.

| WWTP                           | A1   | A2   | B    | C    | D1   | D2   | E1   | E2   | F    | G1   | G2   | H    | I    | J    |
|--------------------------------|------|------|------|------|------|------|------|------|------|------|------|------|------|------|
| Leptotrichiaceae               | 0.17 | 0.00 | 0.16 | 0.21 | 0.79 | 0.96 | 0.08 | 0.00 | 0.03 | 0.00 | 0.05 | 0.10 | 0.10 | 0.10 |
| Fusobacteriaceae               | 0.15 | 0.19 | 0.03 | 0.18 | 0.07 | 0.15 | 0.00 | 0.01 | 0.00 | 0.02 | 0.00 | 0.03 | 0.00 | 0.02 |
| Caldiseriaceae                 | 0.00 | 0.00 | 0.00 | 0.00 | 0.00 | 0.00 | 0.00 | 0.00 | 0.00 | 0.00 | 0.00 | 0.00 | 0.00 | 0.02 |
| Acidimicrobinae_incertae_sedis | 0.00 | 0.00 | 0.00 | 0.04 | 0.00 | 0.00 | 0.12 | 0.04 | 0.05 | 0.20 | 0.05 | 0.05 | 0.06 | 0.14 |
| Acidimicrobiaceae              | 0.02 | 0.00 | 0.11 | 0.02 | 0.04 | 0.04 | 0.14 | 0.07 | 0.03 | 0.29 | 0.23 | 0.21 | 0.05 | 0.17 |
| Iamiaceae                      | 0.00 | 0.00 | 0.00 | 0.00 | 0.00 | 0.00 | 0.02 | 0.00 | 0.03 | 0.00 | 0.00 | 0.00 | 0.02 | 0.02 |
| Rubroacteraceae                | 0.00 | 0.00 | 0.00 | 0.00 | 0.00 | 0.00 | 0.00 | 0.00 | 0.00 | 0.00 | 0.02 | 0.00 | 0.00 | 0.00 |
| Conexibacteraceae              | 0.04 | 0.00 | 0.00 | 0.02 | 0.00 | 0.09 | 0.00 | 0.06 | 0.11 | 0.04 | 0.29 | 0.24 | 0.26 | 0.29 |
| Solirubroacteraceae            | 0.00 | 0.00 | 0.00 | 0.00 | 0.00 | 0.00 | 0.00 | 0.00 | 0.05 | 0.02 | 0.03 | 0.03 | 0.06 | 0.10 |
| Pseudonocardiaceae             | 0.00 | 0.00 | 0.00 | 0.00 | 0.00 | 0.00 | 0.00 | 0.00 | 0.00 | 0.00 | 0.00 | 0.00 | 0.00 | 0.02 |
| Intrasporangiaceae             | 0.00 | 0.00 | 0.08 | 0.02 | 0.07 | 0.00 | 0.02 | 0.04 | 0.00 | 0.02 | 0.11 | 0.02 | 0.03 | 0.02 |
| Micrococcaceae                 | 0.00 | 0.00 | 0.00 | 0.00 | 0.00 | 0.00 | 0.00 | 0.00 | 0.00 | 0.00 | 0.00 | 0.02 | 0.00 | 0.00 |
| Beutenbergiaceae               | 0.00 | 0.00 | 0.00 | 0.00 | 0.00 | 0.00 | 0.02 | 0.00 | 0.00 | 0.00 | 0.00 | 0.00 | 0.00 | 0.00 |
| Dermabacteraceae               | 0.02 | 0.00 | 0.00 | 0.02 | 0.02 | 0.00 | 0.00 | 0.00 | 0.00 | 0.00 | 0.02 | 0.02 | 0.00 | 0.00 |
| Microbacteriaceae              | 0.00 | 0.04 | 0.03 | 0.00 | 0.00 | 0.02 | 0.02 | 0.03 | 0.00 | 0.00 | 0.00 | 0.02 | 0.06 | 0.02 |
| Sanguibacteraceae              | 0.00 | 0.00 | 0.03 | 0.00 | 0.00 | 0.00 | 0.00 | 0.00 | 0.00 | 0.00 | 0.00 | 0.00 | 0.00 | 0.00 |
| Sporichthyaceae                | 0.00 | 0.00 | 0.00 | 0.00 | 0.00 | 0.00 | 0.00 | 0.01 | 0.00 | 0.00 | 0.00 | 0.00 | 0.00 | 0.00 |
| Geodermatophilaceae            | 0.00 | 0.00 | 0.00 | 0.00 | 0.00 | 0.00 | 0.02 | 0.00 | 0.00 | 0.00 | 0.00 | 0.00 | 0.00 | 0.00 |
| Nakamurellaceae                | 0.00 | 0.00 | 0.00 | 0.00 | 0.00 | 0.00 | 0.00 | 0.00 | 0.00 | 0.00 | 0.00 | 0.02 | 0.00 | 0.00 |
| Actinomycetaceae               | 0.00 | 0.04 | 0.00 | 0.00 | 0.00 | 0.00 | 0.00 | 0.00 | 0.00 | 0.02 | 0.03 | 0.00 | 0.03 | 0.03 |
| Nocardiaceae                   | 0.00 | 0.00 | 0.00 | 0.00 | 0.00 | 0.00 | 0.00 | 0.01 | 0.00 | 0.02 | 0.02 | 0.00 | 0.00 | 0.00 |
| Mycobacteriaceae               | 0.00 | 0.00 | 0.00 | 0.10 | 0.04 | 0.02 | 0.00 | 0.00 | 0.03 | 0.09 | 0.07 | 0.02 | 0.08 | 0.03 |
| Corynebacteriaceae             | 0.00 | 0.04 | 0.00 | 0.00 | 0.04 | 0.00 | 0.00 | 0.00 | 0.00 | 0.00 | 0.00 | 0.00 | 0.03 | 0.00 |
| Nocardioidaceae                | 0.15 | 0.04 | 0.27 | 0.02 | 0.04 | 0.13 | 0.04 | 0.04 | 0.05 | 0.00 | 0.23 | 0.16 | 0.14 | 0.17 |

|                      |       |      |      |       |       |      |      |       |       |      |       |       |      |      |
|----------------------|-------|------|------|-------|-------|------|------|-------|-------|------|-------|-------|------|------|
| Micromonosporaceae   | 0.00  | 0.00 | 0.00 | 0.00  | 0.00  | 0.00 | 0.00 | 0.00  | 0.03  | 0.00 | 0.00  | 0.00  | 0.00 | 0.00 |
| Bifidobacteriaceae   | 0.15  | 0.47 | 0.38 | 0.43  | 0.04  | 0.24 | 0.33 | 0.09  | 0.25  | 0.02 | 0.05  | 0.09  | 0.13 | 0.28 |
| Coriobacteriaceae    | 0.00  | 0.00 | 0.00 | 0.00  | 0.00  | 0.00 | 0.02 | 0.00  | 0.00  | 0.02 | 0.00  | 0.00  | 0.02 | 0.02 |
| Spirochaetaceae      | 0.04  | 0.00 | 0.03 | 0.00  | 0.04  | 0.06 | 0.08 | 0.00  | 0.03  | 0.00 | 0.02  | 0.00  | 0.02 | 0.03 |
| Leptospiraceae       | 1.11  | 0.19 | 0.85 | 1.25  | 0.76  | 0.94 | 0.53 | 0.04  | 0.11  | 0.11 | 0.15  | 0.12  | 0.11 | 0.31 |
| Rikenellaceae        | 0.04  | 0.00 | 0.00 | 0.02  | 0.00  | 0.00 | 0.00 | 0.01  | 0.00  | 0.02 | 0.02  | 0.00  | 0.02 | 0.02 |
| Marinilabiaceae      | 0.21  | 0.04 | 0.03 | 0.06  | 0.15  | 0.04 | 0.08 | 0.00  | 0.05  | 0.00 | 0.03  | 0.03  | 0.03 | 0.02 |
| Prevotellaceae       | 0.38  | 0.00 | 0.30 | 0.06  | 0.61  | 0.11 | 0.06 | 0.01  | 0.00  | 0.04 | 0.03  | 0.05  | 0.03 | 0.00 |
| Bacteroidaceae       | 0.55  | 0.08 | 0.16 | 0.98  | 0.70  | 0.09 | 0.08 | 0.04  | 0.03  | 0.11 | 0.08  | 0.00  | 0.05 | 0.10 |
| Porphyromonadaceae   | 1.70  | 0.47 | 0.47 | 1.99  | 2.23  | 0.47 | 0.90 | 0.37  | 0.33  | 0.20 | 1.16  | 1.06  | 1.04 | 1.49 |
| Saprosiraceae        | 2.58  | 0.62 | 2.94 | 19.60 | 10.54 | 4.05 | 1.81 | 3.77  | 0.82  | 0.53 | 2.67  | 2.23  | 2.51 | 3.01 |
| Cyclobacteriaceae    | 0.00  | 0.00 | 0.03 | 0.02  | 0.06  | 0.00 | 0.00 | 0.00  | 0.00  | 0.00 | 0.00  | 0.00  | 0.00 | 0.02 |
| Rhodothermaceae      | 0.02  | 0.00 | 0.00 | 0.02  | 0.00  | 0.00 | 0.00 | 0.00  | 0.00  | 0.00 | 0.03  | 0.00  | 0.00 | 0.00 |
| Cytophagaceae        | 0.10  | 0.43 | 0.25 | 0.76  | 0.13  | 0.09 | 0.00 | 0.01  | 0.03  | 0.00 | 0.03  | 0.03  | 0.05 | 0.02 |
| Flammeovirgaceae     | 0.99  | 1.01 | 0.16 | 0.06  | 0.09  | 0.00 | 0.00 | 0.12  | 0.41  | 0.24 | 0.03  | 0.09  | 0.08 | 0.12 |
| Sphingobacteriaceae  | 0.61  | 0.58 | 0.55 | 0.59  | 1.75  | 0.09 | 0.08 | 0.06  | 0.03  | 0.13 | 0.07  | 0.03  | 0.13 | 0.14 |
| Chitinophagaceae     | 27.85 | 7.70 | 7.19 | 12.63 | 17.64 | 8.77 | 6.08 | 59.26 | 11.03 | 2.37 | 11.60 | 11.62 | 9.94 | 9.72 |
| Cryomorphaceae       | 3.15  | 0.70 | 0.63 | 2.73  | 1.92  | 1.01 | 0.94 | 0.70  | 0.60  | 0.15 | 0.59  | 0.58  | 0.40 | 0.33 |
| Flavobacteriaceae    | 4.85  | 1.21 | 1.46 | 0.43  | 1.70  | 0.43 | 0.16 | 0.12  | 0.11  | 0.09 | 0.77  | 0.56  | 0.67 | 0.93 |
| Helicobacteraceae    | 0.08  | 0.00 | 0.00 | 0.10  | 0.00  | 0.00 | 0.00 | 0.00  | 0.00  | 0.00 | 0.00  | 0.00  | 0.00 | 0.02 |
| Campylobacteraceae   | 0.52  | 0.00 | 0.11 | 0.57  | 0.28  | 0.30 | 0.04 | 0.01  | 0.00  | 0.00 | 0.07  | 0.02  | 0.03 | 0.02 |
| Syntrophaceae        | 0.04  | 0.00 | 0.03 | 0.00  | 0.02  | 0.02 | 0.08 | 0.06  | 0.05  | 0.09 | 0.00  | 0.07  | 0.10 | 0.10 |
| Syntrophobacteraceae | 0.00  | 0.04 | 0.00 | 0.00  | 0.00  | 0.00 | 0.00 | 0.00  | 0.00  | 0.00 | 0.02  | 0.05  | 0.03 | 0.00 |
| Desulfomicrobiaceae  | 0.21  | 0.04 | 0.19 | 0.06  | 0.07  | 0.04 | 0.06 | 0.00  | 0.03  | 0.09 | 0.05  | 0.02  | 0.02 | 0.00 |
| Desulfovibrionaceae  | 0.02  | 0.00 | 0.03 | 0.04  | 0.20  | 0.09 | 0.02 | 0.00  | 0.00  | 0.11 | 0.02  | 0.02  | 0.03 | 0.03 |
| Bdellovibrionaceae   | 0.67  | 1.13 | 0.22 | 0.64  | 0.33  | 0.36 | 0.14 | 0.06  | 0.22  | 0.11 | 0.28  | 0.28  | 0.27 | 0.22 |

|                                |      |       |       |      |      |       |       |      |      |      |      |      |      |      |
|--------------------------------|------|-------|-------|------|------|-------|-------|------|------|------|------|------|------|------|
| Bacteriovoraceae               | 0.02 | 0.08  | 0.27  | 0.16 | 0.04 | 0.45  | 0.00  | 0.00 | 0.11 | 0.00 | 0.00 | 0.02 | 0.00 | 0.03 |
| Desulfuromonadaceae            | 0.00 | 0.00  | 0.00  | 0.00 | 0.00 | 0.00  | 0.00  | 0.00 | 0.00 | 0.00 | 0.02 | 0.00 | 0.03 | 0.00 |
| Geobacteraceae                 | 0.08 | 0.08  | 0.19  | 0.12 | 0.07 | 0.02  | 0.14  | 0.00 | 0.11 | 0.04 | 0.00 | 0.00 | 0.02 | 0.02 |
| Syntrophorhabdaceae            | 0.23 | 0.00  | 0.11  | 0.00 | 0.02 | 0.02  | 0.12  | 0.00 | 0.08 | 0.07 | 2.17 | 2.33 | 3.05 | 3.30 |
| Desulfobulbaceae               | 0.19 | 0.04  | 0.47  | 0.18 | 0.29 | 0.45  | 0.12  | 0.01 | 0.14 | 0.09 | 0.24 | 0.26 | 0.16 | 0.26 |
| Desulfobacteraceae             | 0.06 | 0.04  | 0.19  | 0.06 | 0.00 | 0.06  | 0.10  | 0.03 | 0.14 | 0.09 | 0.03 | 0.03 | 0.05 | 0.03 |
| Cystobacteraceae               | 0.25 | 0.31  | 0.69  | 0.45 | 0.11 | 0.34  | 0.20  | 0.09 | 0.27 | 2.53 | 0.20 | 0.24 | 0.13 | 0.29 |
| Myxococcaceae                  | 0.00 | 0.00  | 0.00  | 0.02 | 0.00 | 0.02  | 0.00  | 0.00 | 0.00 | 0.09 | 0.02 | 0.03 | 0.02 | 0.00 |
| Kofleriaceae                   | 0.02 | 0.04  | 0.03  | 0.02 | 0.04 | 0.02  | 0.00  | 0.00 | 0.00 | 0.02 | 0.00 | 0.00 | 0.00 | 0.00 |
| Nannocystaceae                 | 0.08 | 0.35  | 0.19  | 0.61 | 1.60 | 0.88  | 0.79  | 0.04 | 0.00 | 0.00 | 0.52 | 0.40 | 0.32 | 0.12 |
| Haliangiaceae                  | 0.00 | 0.00  | 0.00  | 0.00 | 0.04 | 0.00  | 0.06  | 0.00 | 0.00 | 0.02 | 0.00 | 0.05 | 0.06 | 0.02 |
| Phaselicystidaceae             | 0.00 | 0.00  | 0.03  | 0.00 | 0.00 | 0.02  | 0.00  | 0.00 | 0.00 | 0.15 | 0.00 | 0.00 | 0.00 | 0.02 |
| Polyangiaceae                  | 0.90 | 1.13  | 0.69  | 2.03 | 0.66 | 2.06  | 1.77  | 0.12 | 0.46 | 1.10 | 0.36 | 0.47 | 0.34 | 0.40 |
| Nitrosomonadaceae              | 0.50 | 1.75  | 0.52  | 0.10 | 0.00 | 0.26  | 0.31  | 0.09 | 1.72 | 0.11 | 0.51 | 0.56 | 0.48 | 0.35 |
| Burkholderiales_incertae_sedis | 1.34 | 0.89  | 2.64  | 1.42 | 1.58 | 3.34  | 4.56  | 1.01 | 1.47 | 2.06 | 1.16 | 1.24 | 0.96 | 0.80 |
| Sutterellaceae                 | 0.00 | 0.00  | 0.03  | 0.04 | 0.02 | 0.00  | 0.00  | 0.00 | 0.00 | 0.00 | 0.00 | 0.00 | 0.00 | 0.02 |
| Burkholderiaceae               | 0.02 | 0.00  | 0.00  | 0.00 | 0.00 | 0.00  | 0.00  | 0.00 | 0.03 | 0.00 | 0.00 | 0.00 | 0.02 | 0.00 |
| Alcaligenaceae                 | 0.13 | 0.12  | 0.33  | 0.04 | 0.07 | 0.09  | 0.12  | 0.15 | 0.22 | 0.11 | 0.10 | 0.14 | 0.16 | 0.10 |
| Oxalobacteraceae               | 0.02 | 0.23  | 0.00  | 0.02 | 0.11 | 0.06  | 0.06  | 0.03 | 0.05 | 0.02 | 0.02 | 0.00 | 0.05 | 0.02 |
| Comamonadaceae                 | 0.82 | 2.60  | 3.43  | 2.17 | 2.80 | 4.61  | 9.09  | 2.92 | 3.57 | 2.68 | 2.09 | 2.84 | 2.12 | 1.28 |
| Hydrogenophilaceae             | 0.08 | 0.00  | 0.00  | 0.00 | 0.00 | 0.00  | 0.00  | 0.03 | 0.38 | 0.04 | 0.10 | 0.03 | 0.06 | 0.02 |
| Methylophilaceae               | 0.00 | 0.00  | 0.00  | 0.72 | 0.15 | 0.02  | 0.00  | 0.00 | 0.00 | 0.00 | 0.26 | 0.19 | 0.21 | 0.02 |
| Neisseriaceae                  | 0.25 | 0.39  | 0.41  | 0.02 | 0.09 | 0.11  | 0.57  | 0.16 | 3.13 | 0.44 | 0.33 | 0.54 | 0.16 | 0.14 |
| Rhodocyclaceae                 | 8.71 | 11.04 | 11.34 | 2.93 | 6.51 | 16.27 | 13.89 | 3.16 | 7.08 | 6.06 | 4.30 | 5.37 | 3.76 | 2.34 |
| Bradyrhizobiaceae              | 1.97 | 1.09  | 2.11  | 0.57 | 0.33 | 0.73  | 0.31  | 0.61 | 1.99 | 1.19 | 2.35 | 1.85 | 2.07 | 2.08 |
| Rhizobiaceae                   | 0.04 | 0.04  | 0.03  | 0.02 | 0.02 | 0.02  | 0.02  | 0.07 | 0.08 | 0.18 | 0.11 | 0.07 | 0.13 | 0.09 |



|                                |      |      |      |      |      |      |      |      |      |      |      |      |      |      |
|--------------------------------|------|------|------|------|------|------|------|------|------|------|------|------|------|------|
| Methylocystaceae               | 0.08 | 0.04 | 0.27 | 0.00 | 0.07 | 0.04 | 0.04 | 0.18 | 0.14 | 0.18 | 0.23 | 0.31 | 0.40 | 0.26 |
| Beijerinckiaceae               | 0.00 | 0.04 | 0.08 | 0.06 | 0.02 | 0.04 | 0.02 | 0.04 | 0.08 | 0.15 | 0.07 | 0.10 | 0.08 | 0.19 |
| Phyllobacteriaceae             | 0.08 | 0.12 | 0.03 | 0.00 | 0.13 | 0.02 | 0.02 | 0.01 | 0.16 | 0.07 | 0.08 | 0.05 | 0.02 | 0.03 |
| Rhodobiaceae                   | 0.04 | 0.19 | 0.00 | 0.02 | 0.02 | 0.02 | 0.10 | 0.10 | 0.11 | 0.11 | 0.24 | 0.26 | 0.27 | 0.28 |
| Brucellaceae                   | 0.00 | 0.00 | 0.00 | 0.00 | 0.00 | 0.00 | 0.00 | 0.06 | 0.00 | 0.00 | 0.00 | 0.00 | 0.00 | 0.02 |
| Rhizobiales_incertae_sedis     | 0.02 | 0.08 | 0.03 | 0.00 | 0.02 | 0.06 | 0.02 | 0.01 | 0.11 | 0.13 | 0.03 | 0.03 | 0.03 | 0.09 |
| Xanthobacteraceae              | 0.00 | 0.19 | 0.22 | 0.16 | 0.00 | 0.11 | 0.02 | 0.04 | 0.08 | 0.02 | 0.29 | 0.12 | 0.14 | 0.05 |
| Methylobacteriaceae            | 0.00 | 0.00 | 0.00 | 0.00 | 0.00 | 0.00 | 0.02 | 0.00 | 0.00 | 0.00 | 0.00 | 0.00 | 0.02 | 0.00 |
| Hyphomicrobiaceae              | 2.18 | 0.54 | 4.34 | 2.05 | 0.79 | 0.49 | 0.73 | 1.74 | 2.23 | 6.65 | 6.24 | 6.15 | 6.02 | 5.05 |
| Aurantimonadaceae              | 0.00 | 0.04 | 0.00 | 0.00 | 0.00 | 0.00 | 0.00 | 0.00 | 0.00 | 0.00 | 0.00 | 0.00 | 0.00 | 0.00 |
| Parvularculaceae               | 0.00 | 0.00 | 0.00 | 0.00 | 0.04 | 0.00 | 0.00 | 0.00 | 0.00 | 0.00 | 0.00 | 0.02 | 0.00 | 0.02 |
| Hyphomonadaceae                | 0.04 | 0.04 | 0.03 | 0.00 | 0.00 | 0.04 | 0.00 | 0.00 | 0.00 | 0.07 | 0.07 | 0.03 | 0.00 | 0.00 |
| Caulobacteraceae               | 0.90 | 0.70 | 1.81 | 0.72 | 1.09 | 0.66 | 0.24 | 1.16 | 1.09 | 0.77 | 0.51 | 0.64 | 0.55 | 0.40 |
| Anaplasmataceae                | 0.00 | 0.00 | 0.00 | 0.00 | 0.00 | 0.00 | 0.02 | 0.00 | 0.00 | 0.00 | 0.00 | 0.00 | 0.00 | 0.00 |
| Rickettsiaceae                 | 0.23 | 0.04 | 0.11 | 0.16 | 0.26 | 0.00 | 0.02 | 0.00 | 0.11 | 0.24 | 0.00 | 0.02 | 0.05 | 0.03 |
| Sphingomonadaceae              | 3.61 | 0.78 | 4.75 | 0.45 | 2.88 | 0.86 | 0.49 | 2.01 | 2.67 | 8.23 | 2.10 | 2.68 | 2.54 | 2.35 |
| Erythrobacteraceae             | 0.02 | 0.00 | 0.05 | 0.02 | 0.00 | 0.00 | 0.00 | 0.04 | 0.05 | 0.02 | 0.02 | 0.02 | 0.03 | 0.02 |
| Rhodospirillaceae              | 0.63 | 7.12 | 0.82 | 0.82 | 0.17 | 0.17 | 0.69 | 0.07 | 1.44 | 1.27 | 0.41 | 0.54 | 0.40 | 0.17 |
| Acetobacteraceae               | 0.78 | 2.76 | 1.59 | 0.90 | 0.15 | 1.11 | 0.41 | 0.37 | 3.54 | 1.93 | 0.55 | 0.71 | 0.39 | 0.35 |
| Rhodobacteraceae               | 2.16 | 1.13 | 5.13 | 1.25 | 1.66 | 2.02 | 0.73 | 2.38 | 1.42 | 1.67 | 2.75 | 3.28 | 3.08 | 2.61 |
| Pseudomonadales_incertae_sedis | 0.00 | 0.00 | 0.00 | 0.00 | 0.00 | 0.00 | 0.02 | 0.00 | 0.00 | 0.00 | 0.02 | 0.00 | 0.02 | 0.00 |
| Moraxellaceae                  | 1.66 | 1.28 | 3.93 | 3.77 | 1.99 | 2.34 | 2.20 | 0.25 | 0.25 | 0.11 | 0.77 | 0.52 | 0.61 | 1.12 |
| Pseudomonadaceae               | 0.06 | 0.08 | 0.05 | 0.06 | 0.07 | 0.34 | 0.10 | 0.03 | 0.08 | 0.04 | 0.08 | 0.05 | 0.02 | 0.05 |
| Chromatiaceae                  | 0.00 | 0.12 | 0.16 | 0.06 | 0.02 | 0.04 | 0.45 | 0.10 | 0.46 | 0.04 | 0.18 | 0.21 | 0.11 | 0.09 |
| Ectothiorhodospiraceae         | 0.00 | 0.00 | 0.03 | 0.00 | 0.02 | 0.00 | 0.00 | 0.00 | 0.00 | 0.00 | 0.03 | 0.05 | 0.00 | 0.00 |
| Halothiobacillaceae            | 0.00 | 0.00 | 0.00 | 0.00 | 0.00 | 0.00 | 0.00 | 0.00 | 0.00 | 0.00 | 0.00 | 0.02 | 0.00 | 0.00 |

|                              |      |      |      |      |      |       |       |      |      |      |      |      |      |      |
|------------------------------|------|------|------|------|------|-------|-------|------|------|------|------|------|------|------|
| Hahellaceae                  | 0.00 | 0.00 | 0.03 | 0.00 | 0.00 | 0.00  | 0.00  | 0.00 | 0.00 | 0.09 | 0.02 | 0.00 | 0.00 | 0.00 |
| Oceanospirillaceae           | 0.00 | 0.00 | 0.03 | 0.00 | 0.00 | 0.00  | 0.02  | 0.00 | 0.00 | 0.00 | 0.00 | 0.02 | 0.02 | 0.02 |
| Legionellaceae               | 0.06 | 0.31 | 0.08 | 0.16 | 0.24 | 0.84  | 0.10  | 0.03 | 0.08 | 0.07 | 0.07 | 0.10 | 0.06 | 0.05 |
| Coxiellaceae                 | 0.44 | 0.12 | 0.38 | 0.02 | 0.02 | 0.09  | 0.08  | 0.01 | 1.53 | 0.07 | 0.11 | 0.31 | 0.16 | 0.12 |
| Enterobacteriaceae           | 0.02 | 0.00 | 0.08 | 0.02 | 0.07 | 0.04  | 0.04  | 0.06 | 0.16 | 0.02 | 0.02 | 0.05 | 0.02 | 0.02 |
| Sinobacteraceae              | 0.00 | 0.08 | 0.11 | 0.10 | 0.02 | 0.02  | 0.14  | 0.06 | 1.80 | 0.77 | 0.20 | 0.33 | 0.27 | 0.12 |
| Xanthomonadaceae             | 6.47 | 6.92 | 8.43 | 2.01 | 6.87 | 12.01 | 16.76 | 7.98 | 4.03 | 1.38 | 2.26 | 2.30 | 2.10 | 2.16 |
| Aeromonadaceae               | 0.02 | 0.04 | 0.27 | 0.00 | 0.07 | 0.04  | 0.12  | 0.00 | 0.00 | 0.00 | 0.00 | 0.02 | 0.05 | 0.00 |
| Succinivibrionaceae          | 0.00 | 0.00 | 0.03 | 0.00 | 0.00 | 0.00  | 0.00  | 0.00 | 0.00 | 0.00 | 0.00 | 0.00 | 0.00 | 0.00 |
| Alteromonadaceae             | 0.04 | 0.04 | 0.03 | 0.57 | 0.11 | 0.00  | 0.16  | 0.00 | 0.27 | 0.00 | 0.02 | 0.05 | 0.00 | 0.05 |
| Methylococcaceae             | 0.76 | 0.04 | 0.22 | 0.64 | 0.07 | 0.04  | 0.10  | 0.19 | 1.53 | 0.55 | 0.15 | 0.30 | 0.21 | 0.22 |
| Thiotrichales_incertae_sedis | 0.02 | 0.00 | 0.00 | 0.21 | 0.02 | 0.00  | 0.00  | 0.01 | 0.03 | 0.00 | 0.03 | 0.03 | 0.08 | 0.02 |
| Thiotrichaceae               | 0.00 | 0.04 | 0.03 | 0.23 | 0.07 | 0.00  | 0.02  | 0.01 | 0.11 | 0.02 | 0.00 | 0.07 | 0.06 | 0.07 |
| Family II                    | 0.08 | 0.00 | 0.16 | 0.00 | 0.00 | 0.00  | 0.00  | 0.00 | 0.00 | 0.02 | 0.02 | 0.00 | 0.00 | 0.00 |
| Family XIII                  | 0.04 | 0.00 | 0.03 | 0.04 | 0.00 | 0.02  | 0.00  | 0.00 | 0.00 | 0.00 | 0.00 | 0.00 | 0.00 | 0.00 |
| Family XI                    | 0.00 | 0.00 | 0.00 | 0.00 | 0.00 | 0.00  | 0.02  | 0.00 | 0.00 | 0.00 | 0.00 | 0.00 | 0.00 | 0.00 |
| Family IV                    | 0.02 | 0.00 | 0.00 | 0.00 | 0.00 | 0.00  | 0.00  | 0.00 | 0.00 | 0.00 | 0.00 | 0.00 | 0.00 | 0.00 |
| Chloroplast                  | 0.36 | 0.04 | 0.00 | 0.00 | 0.00 | 0.00  | 0.00  | 0.00 | 0.03 | 0.00 | 0.00 | 0.00 | 0.02 | 0.05 |
| Chthonomonadaceae            | 0.00 | 0.00 | 0.03 | 0.00 | 0.00 | 0.00  | 0.02  | 0.00 | 0.00 | 0.00 | 0.00 | 0.00 | 0.00 | 0.00 |
| Armatimonadaceae             | 0.08 | 0.04 | 0.11 | 0.00 | 0.00 | 0.02  | 0.00  | 0.00 | 0.03 | 0.09 | 0.03 | 0.00 | 0.02 | 0.05 |
| Thermotogaceae               | 0.00 | 0.00 | 0.00 | 0.00 | 0.00 | 0.00  | 0.00  | 0.00 | 0.05 | 0.02 | 0.00 | 0.02 | 0.02 | 0.02 |
| Nitrospiraceae               | 0.10 | 0.39 | 0.03 | 0.02 | 0.00 | 0.04  | 0.10  | 0.00 | 0.03 | 0.13 | 0.07 | 0.12 | 0.11 | 0.12 |
| Gemmatimonadaceae            | 0.29 | 3.15 | 0.80 | 0.21 | 0.11 | 0.51  | 1.30  | 0.01 | 0.14 | 0.15 | 0.11 | 0.26 | 0.29 | 0.19 |
| Ignavibacteriaceae           | 0.06 | 1.32 | 0.11 | 0.35 | 0.42 | 0.06  | 1.02  | 0.09 | 4.08 | 2.06 | 0.70 | 0.49 | 0.56 | 0.83 |
| Holophagaceae                | 0.13 | 0.00 | 0.11 | 0.00 | 0.06 | 0.09  | 0.04  | 0.10 | 0.41 | 0.11 | 0.02 | 0.02 | 0.05 | 0.09 |
| Natranaerobiaceae            | 0.00 | 0.00 | 0.00 | 0.00 | 0.00 | 0.00  | 0.00  | 0.00 | 0.00 | 0.00 | 0.02 | 0.00 | 0.00 | 0.00 |

|                                   |      |      |      |      |      |      |      |      |      |      |      |      |      |      |
|-----------------------------------|------|------|------|------|------|------|------|------|------|------|------|------|------|------|
| Clostridiales_incertae_sedis      | 0.00 | 0.00 | 0.00 | 0.00 | 0.00 | 0.00 | 0.00 | 0.00 | 0.00 | 0.00 | 0.05 | 0.02 | 0.00 | 0.02 |
| Clostridiales_Incertae Sedis XII  | 0.57 | 0.16 | 0.14 | 0.06 | 0.07 | 0.02 | 0.02 | 0.00 | 0.03 | 0.02 | 0.18 | 0.07 | 0.14 | 0.10 |
| Peptococcaceae 1                  | 0.00 | 0.00 | 0.03 | 0.00 | 0.00 | 0.02 | 0.00 | 0.00 | 0.00 | 0.02 | 0.00 | 0.07 | 0.06 | 0.03 |
| Clostridiales_Incertae Sedis XIII | 0.06 | 0.00 | 0.00 | 0.00 | 0.00 | 0.02 | 0.02 | 0.00 | 0.00 | 0.00 | 0.02 | 0.03 | 0.02 | 0.05 |
| Peptococcaceae 2                  | 0.00 | 0.04 | 0.03 | 0.00 | 0.00 | 0.00 | 0.06 | 0.00 | 0.00 | 0.02 | 0.21 | 0.42 | 0.58 | 0.43 |
| Clostridiaceae 4                  | 0.02 | 0.04 | 0.00 | 0.00 | 0.00 | 0.00 | 0.00 | 0.00 | 0.00 | 0.00 | 0.00 | 0.00 | 0.00 | 0.00 |
| Veillonellaceae                   | 0.08 | 0.00 | 0.05 | 0.08 | 0.18 | 0.13 | 0.16 | 0.04 | 0.14 | 0.04 | 0.08 | 0.12 | 0.06 | 0.19 |
| Clostridiaceae 1                  | 0.08 | 0.08 | 0.03 | 0.02 | 0.04 | 0.04 | 0.04 | 0.00 | 0.11 | 0.02 | 0.31 | 0.19 | 0.35 | 0.19 |
| Lachnospiraceae                   | 0.17 | 0.04 | 0.27 | 0.20 | 0.28 | 0.21 | 0.75 | 0.10 | 0.05 | 0.02 | 0.20 | 0.07 | 0.11 | 0.16 |
| Clostridiaceae 2                  | 0.06 | 0.00 | 0.00 | 0.00 | 0.00 | 0.00 | 0.00 | 0.01 | 0.00 | 0.00 | 0.08 | 0.05 | 0.03 | 0.00 |
| Clostridiales_Incertae Sedis XI   | 0.36 | 0.00 | 0.11 | 0.02 | 0.00 | 0.06 | 0.02 | 0.00 | 0.03 | 0.00 | 0.72 | 0.66 | 0.82 | 1.30 |
| Syntrophomonadaceae               | 0.04 | 0.00 | 0.00 | 0.00 | 0.00 | 0.00 | 0.02 | 0.00 | 0.00 | 0.00 | 0.28 | 0.28 | 0.47 | 0.52 |
| Ruminococcaceae                   | 1.36 | 0.08 | 0.82 | 0.33 | 0.53 | 0.62 | 2.54 | 0.16 | 0.27 | 0.07 | 0.60 | 0.58 | 0.53 | 0.93 |
| Incertae Sedis XI                 | 0.02 | 0.00 | 0.00 | 0.00 | 0.00 | 0.00 | 0.00 | 0.00 | 0.00 | 0.02 | 0.00 | 0.00 | 0.00 | 0.00 |
| Eubacteriaceae                    | 0.06 | 0.00 | 0.00 | 0.02 | 0.00 | 0.00 | 0.02 | 0.00 | 0.00 | 0.00 | 0.11 | 0.16 | 0.14 | 0.22 |
| Peptostreptococcaceae             | 0.38 | 0.12 | 0.33 | 0.49 | 0.11 | 0.11 | 0.28 | 0.00 | 0.25 | 0.09 | 1.84 | 1.57 | 1.82 | 2.44 |
| Gracilibacteraceae                | 0.00 | 0.00 | 0.00 | 0.00 | 0.00 | 0.02 | 0.00 | 0.00 | 0.00 | 0.00 | 0.02 | 0.00 | 0.00 | 0.02 |
| Thermodesulfofiaceae              | 0.00 | 0.00 | 0.00 | 0.00 | 0.00 | 0.00 | 0.00 | 0.00 | 0.00 | 0.00 | 0.00 | 0.02 | 0.02 | 0.00 |
| Thermoanaerobacteraceae           | 0.00 | 0.00 | 0.00 | 0.00 | 0.00 | 0.00 | 0.00 | 0.00 | 0.00 | 0.00 | 0.00 | 0.00 | 0.02 | 0.02 |
| Streptococcaceae                  | 0.23 | 0.16 | 0.22 | 0.23 | 2.69 | 0.49 | 0.12 | 0.13 | 0.11 | 0.79 | 0.11 | 0.14 | 0.22 | 0.16 |
| Aerococcaceae                     | 0.02 | 0.00 | 0.03 | 0.00 | 0.00 | 0.00 | 0.02 | 0.00 | 0.03 | 0.00 | 0.02 | 0.02 | 0.02 | 0.00 |
| Leuconostocaceae                  | 0.02 | 0.00 | 0.00 | 0.00 | 0.04 | 0.02 | 0.00 | 0.00 | 0.03 | 0.00 | 0.03 | 0.03 | 0.00 | 0.03 |
| Carnobacteriaceae                 | 0.50 | 0.16 | 0.77 | 0.16 | 0.18 | 0.19 | 0.33 | 0.19 | 0.33 | 2.59 | 0.90 | 0.80 | 0.71 | 0.81 |
| Lactobacillaceae                  | 0.04 | 0.04 | 0.05 | 0.04 | 0.04 | 0.02 | 0.02 | 0.01 | 0.05 | 0.04 | 0.05 | 0.02 | 0.08 | 0.10 |
| Bacillaceae 1                     | 0.00 | 0.04 | 0.00 | 0.00 | 0.00 | 0.00 | 0.00 | 0.01 | 0.00 | 0.00 | 0.00 | 0.00 | 0.00 | 0.00 |
| Pasteuriaceae                     | 0.88 | 1.48 | 0.80 | 0.80 | 0.55 | 0.21 | 0.28 | 0.57 | 4.03 | 3.21 | 1.60 | 1.45 | 1.59 | 1.75 |

|                                   |      |       |      |       |       |       |       |      |       |       |       |       |       |       |
|-----------------------------------|------|-------|------|-------|-------|-------|-------|------|-------|-------|-------|-------|-------|-------|
| Staphylococcaceae                 | 0.00 | 0.00  | 0.00 | 0.00  | 0.00  | 0.00  | 0.00  | 0.00 | 0.00  | 0.00  | 0.00  | 0.00  | 0.02  | 0.02  |
| Thermoactinomycetaceae 1          | 0.00 | 0.00  | 0.00 | 0.00  | 0.00  | 0.00  | 0.02  | 0.00 | 0.00  | 0.00  | 0.00  | 0.02  | 0.00  | 0.02  |
| Bacillales_Incertae Sedis XI      | 0.00 | 0.00  | 0.00 | 0.00  | 0.00  | 0.00  | 0.00  | 0.03 | 0.00  | 0.00  | 0.00  | 0.00  | 0.00  | 0.00  |
| Erysipelotrichaceae               | 0.10 | 0.00  | 0.03 | 0.08  | 0.00  | 0.02  | 0.00  | 0.01 | 0.03  | 0.04  | 0.00  | 0.03  | 0.06  | 0.09  |
| Deinococcaceae                    | 0.00 | 0.04  | 0.00 | 0.00  | 0.02  | 0.00  | 0.00  | 0.00 | 0.03  | 0.00  | 0.02  | 0.00  | 0.03  | 0.03  |
| Trueperaceae                      | 0.00 | 0.00  | 0.00 | 0.00  | 0.00  | 0.00  | 0.00  | 0.00 | 0.00  | 0.00  | 0.00  | 0.02  | 0.00  | 0.00  |
| Thermaceae                        | 0.00 | 0.00  | 0.00 | 0.00  | 0.04  | 0.02  | 0.00  | 0.03 | 0.00  | 0.00  | 0.02  | 0.00  | 0.00  | 0.00  |
| Synergistaceae                    | 0.23 | 0.12  | 0.41 | 0.14  | 0.20  | 0.17  | 0.22  | 0.13 | 0.11  | 0.18  | 0.85  | 1.01  | 1.03  | 1.33  |
| Puniceicoccaceae                  | 0.00 | 0.00  | 0.00 | 0.00  | 0.00  | 0.00  | 0.00  | 0.00 | 0.00  | 0.04  | 0.00  | 0.00  | 0.00  | 0.02  |
| Opitutaceae                       | 0.52 | 2.10  | 0.49 | 1.15  | 0.41  | 0.77  | 0.31  | 0.03 | 0.08  | 0.02  | 0.08  | 0.05  | 0.16  | 0.14  |
| Verrucomicrobiaceae               | 1.85 | 13.14 | 4.59 | 10.68 | 13.27 | 13.42 | 8.58  | 0.27 | 9.97  | 1.78  | 2.12  | 2.63  | 2.57  | 2.65  |
| Planctomycetaceae                 | 3.02 | 14.15 | 4.01 | 2.89  | 1.36  | 1.65  | 1.50  | 1.31 | 11.87 | 10.14 | 3.13  | 3.66  | 2.99  | 3.53  |
| Phycisphaeraceae                  | 0.00 | 1.87  | 0.00 | 0.02  | 0.00  | 0.02  | 0.00  | 0.00 | 0.33  | 0.18  | 0.05  | 0.03  | 0.02  | 0.05  |
| Victivallaceae                    | 0.04 | 0.00  | 0.00 | 0.00  | 0.02  | 0.00  | 0.00  | 0.00 | 0.00  | 0.00  | 0.02  | 0.00  | 0.02  | 0.00  |
| Anaerolineaceae                   | 3.97 | 0.89  | 9.80 | 10.21 | 4.85  | 9.84  | 13.32 | 5.64 | 5.15  | 25.25 | 32.11 | 28.26 | 32.82 | 32.18 |
| Sphaerobacteraceae                | 0.00 | 0.00  | 0.00 | 0.00  | 0.00  | 0.00  | 0.00  | 0.00 | 0.00  | 0.00  | 0.00  | 0.02  | 0.00  | 0.02  |
| Caldilineaceae                    | 0.36 | 0.82  | 1.37 | 1.21  | 2.27  | 0.39  | 0.37  | 0.27 | 1.01  | 3.51  | 1.29  | 1.46  | 1.37  | 1.94  |
| Parachlamydiaceae                 | 0.88 | 0.97  | 0.47 | 0.74  | 0.35  | 0.75  | 0.39  | 0.12 | 1.80  | 2.02  | 0.37  | 0.73  | 0.42  | 0.50  |
| Simkaniaceae                      | 0.21 | 0.31  | 0.11 | 0.00  | 0.04  | 0.00  | 0.02  | 0.00 | 0.25  | 0.09  | 0.03  | 0.03  | 0.10  | 0.07  |
| Methanobacteriaceae               | 0.00 | 0.00  | 0.00 | 0.00  | 0.00  | 0.00  | 0.00  | 0.01 | 0.00  | 0.02  | 0.00  | 0.00  | 0.00  | 0.02  |
| Methanosaetaceae                  | 0.02 | 0.00  | 0.00 | 0.00  | 0.00  | 0.00  | 0.00  | 0.00 | 0.00  | 0.00  | 0.03  | 0.02  | 0.08  | 0.07  |
| Methanospirillaceae               | 0.08 | 0.08  | 0.05 | 0.06  | 0.00  | 0.02  | 0.04  | 0.00 | 0.08  | 0.07  | 0.03  | 0.05  | 0.13  | 0.12  |
| Methanomicrobiaceae               | 0.00 | 0.04  | 0.00 | 0.00  | 0.00  | 0.00  | 0.00  | 0.00 | 0.00  | 0.02  | 0.20  | 0.28  | 0.47  | 0.45  |
| Methanocorpusculaceae             | 0.00 | 0.00  | 0.00 | 0.00  | 0.02  | 0.00  | 0.00  | 0.00 | 0.00  | 0.00  | 0.00  | 0.00  | 0.00  | 0.00  |
| Methanomicrobiales_incertae_sedis | 0.02 | 0.00  | 0.03 | 0.00  | 0.00  | 0.02  | 0.00  | 0.04 | 0.00  | 0.15  | 0.03  | 0.02  | 0.06  | 0.05  |

TABLE S4 Rare families within each sample

| WWTP | Rare families                                                             |
|------|---------------------------------------------------------------------------|
| A1   | <i>Rubrobacteraceae, Natranaerobiaceae</i>                                |
| A2   | <i>Micrococcaceae, Nakamurellaceae, Halothiobacillaceae, Trueperaceae</i> |
| C    | <i>Caldiseriaceae, Pseudonocardiaceae</i>                                 |
| D1   | Family IV                                                                 |
| D2   | <i>Sporichthyaceae, Bacillales_Incertae, Sedis XI</i>                     |
| E1   | <i>Micromonosporaceae</i>                                                 |
| F    | <i>Aurantimonadaceae</i>                                                  |
| G1   | <i>Sanguibacteraceae, Succinivibrionaceae</i>                             |
| H    | <i>Methanocorpusculaceae</i>                                              |
| I    | <i>Beutenbergiaceae, Geodermatophilaceae, Anaplasmataceae, Family XI</i>  |

TABLE S5 Abundances of all genera in each sample. The abundance is presented in terms of percentages of the total sequences in a sample.

| WWTP                       | A1   | A2   | B    | C    | D1   | D2   | E1   | E2   | F    | G1   | G2   | H    | I    | J    |
|----------------------------|------|------|------|------|------|------|------|------|------|------|------|------|------|------|
| BRC1_genera_incertae_sedis | 0.02 | 0.18 | 0.05 | 0.02 | 0.02 | 0.00 | 0.10 | 0.00 | 0.04 | 0.02 | 0.02 | 0.00 | 0.02 | 0.02 |
| OD1_genera_incertae_sedis  | 1.82 | 0.88 | 0.74 | 1.60 | 0.95 | 0.32 | 0.66 | 0.09 | 0.31 | 0.92 | 0.33 | 0.50 | 0.23 | 0.43 |
| Streptobacillus            | 0.00 | 0.00 | 0.03 | 0.00 | 0.05 | 0.03 | 0.03 | 0.00 | 0.00 | 0.00 | 0.00 | 0.00 | 0.06 | 0.00 |
| Sneathia                   | 0.08 | 0.00 | 0.08 | 0.16 | 0.56 | 0.68 | 0.05 | 0.00 | 0.02 | 0.00 | 0.07 | 0.09 | 0.06 | 0.07 |
| Clostridium XIX            | 0.04 | 0.00 | 0.00 | 0.00 | 0.00 | 0.00 | 0.00 | 0.00 | 0.00 | 0.02 | 0.00 | 0.00 | 0.00 | 0.00 |
| Cetobacterium              | 0.02 | 0.05 | 0.03 | 0.21 | 0.10 | 0.19 | 0.00 | 0.00 | 0.00 | 0.00 | 0.00 | 0.05 | 0.00 | 0.02 |
| Fusobacterium              | 0.08 | 0.03 | 0.00 | 0.00 | 0.00 | 0.00 | 0.00 | 0.00 | 0.00 | 0.00 | 0.00 | 0.00 | 0.00 | 0.00 |
| Propionigenium             | 0.00 | 0.00 | 0.00 | 0.00 | 0.00 | 0.00 | 0.00 | 0.02 | 0.00 | 0.00 | 0.00 | 0.00 | 0.00 | 0.00 |
| Caldisericum               | 0.00 | 0.00 | 0.00 | 0.00 | 0.00 | 0.00 | 0.00 | 0.00 | 0.00 | 0.00 | 0.00 | 0.00 | 0.00 | 0.02 |
| Aciditerrimonas            | 0.00 | 0.00 | 0.00 | 0.05 | 0.00 | 0.00 | 0.15 | 0.06 | 0.04 | 0.20 | 0.07 | 0.07 | 0.08 | 0.18 |
| Illumatobacter             | 0.00 | 0.00 | 0.11 | 0.02 | 0.05 | 0.05 | 0.13 | 0.07 | 0.02 | 0.18 | 0.29 | 0.23 | 0.06 | 0.18 |
| Ferrimicrobium             | 0.02 | 0.00 | 0.00 | 0.00 | 0.00 | 0.00 | 0.00 | 0.00 | 0.00 | 0.02 | 0.00 | 0.02 | 0.00 | 0.02 |
| Iamia                      | 0.00 | 0.00 | 0.00 | 0.00 | 0.00 | 0.00 | 0.03 | 0.00 | 0.02 | 0.00 | 0.00 | 0.00 | 0.02 | 0.02 |
| Rubroacter                 | 0.00 | 0.00 | 0.00 | 0.00 | 0.00 | 0.00 | 0.00 | 0.00 | 0.00 | 0.00 | 0.02 | 0.00 | 0.00 | 0.00 |
| Conexibacter               | 0.04 | 0.00 | 0.00 | 0.02 | 0.00 | 0.11 | 0.00 | 0.07 | 0.09 | 0.04 | 0.40 | 0.32 | 0.34 | 0.38 |
| Solirubroacter             | 0.00 | 0.00 | 0.00 | 0.00 | 0.00 | 0.00 | 0.00 | 0.00 | 0.04 | 0.02 | 0.04 | 0.05 | 0.08 | 0.14 |
| Pseudonocardia             | 0.00 | 0.00 | 0.00 | 0.00 | 0.00 | 0.00 | 0.00 | 0.00 | 0.00 | 0.00 | 0.00 | 0.00 | 0.00 | 0.02 |
| Humihabitans               | 0.00 | 0.00 | 0.00 | 0.00 | 0.00 | 0.00 | 0.00 | 0.00 | 0.00 | 0.00 | 0.02 | 0.00 | 0.00 | 0.00 |
| Knoellia                   | 0.00 | 0.00 | 0.00 | 0.00 | 0.00 | 0.00 | 0.00 | 0.00 | 0.00 | 0.00 | 0.00 | 0.02 | 0.00 | 0.00 |
| Fodinibacter               | 0.00 | 0.00 | 0.00 | 0.00 | 0.00 | 0.00 | 0.00 | 0.02 | 0.00 | 0.00 | 0.00 | 0.00 | 0.00 | 0.00 |
| Ornithinibacter            | 0.00 | 0.00 | 0.00 | 0.02 | 0.07 | 0.00 | 0.00 | 0.00 | 0.00 | 0.00 | 0.04 | 0.00 | 0.00 | 0.00 |
| Serinibacter               | 0.00 | 0.00 | 0.00 | 0.00 | 0.00 | 0.00 | 0.03 | 0.00 | 0.00 | 0.00 | 0.00 | 0.00 | 0.00 | 0.00 |
| Devriesea                  | 0.02 | 0.00 | 0.00 | 0.00 | 0.00 | 0.00 | 0.00 | 0.00 | 0.00 | 0.00 | 0.02 | 0.02 | 0.00 | 0.00 |
| Herbiconiux                | 0.00 | 0.00 | 0.00 | 0.00 | 0.00 | 0.00 | 0.00 | 0.00 | 0.00 | 0.00 | 0.00 | 0.00 | 0.02 | 0.00 |

|                           |      |      |      |       |      |      |      |      |      |      |      |      |      |      |
|---------------------------|------|------|------|-------|------|------|------|------|------|------|------|------|------|------|
| Cryobacterium             | 0.00 | 0.00 | 0.00 | 0.00  | 0.00 | 0.00 | 0.00 | 0.00 | 0.00 | 0.00 | 0.00 | 0.00 | 0.00 | 0.02 |
| Leucobacter               | 0.00 | 0.00 | 0.03 | 0.00  | 0.00 | 0.00 | 0.00 | 0.00 | 0.00 | 0.00 | 0.00 | 0.00 | 0.04 | 0.00 |
| Sanguibacter              | 0.00 | 0.00 | 0.03 | 0.00  | 0.00 | 0.00 | 0.00 | 0.00 | 0.00 | 0.00 | 0.00 | 0.00 | 0.00 | 0.00 |
| Sporichthya               | 0.00 | 0.00 | 0.00 | 0.00  | 0.00 | 0.00 | 0.00 | 0.02 | 0.00 | 0.00 | 0.00 | 0.00 | 0.00 | 0.00 |
| Saxeibacter               | 0.00 | 0.00 | 0.00 | 0.00  | 0.00 | 0.00 | 0.00 | 0.00 | 0.00 | 0.00 | 0.00 | 0.02 | 0.00 | 0.00 |
| Actinomyces               | 0.00 | 0.03 | 0.00 | 0.00  | 0.00 | 0.00 | 0.00 | 0.00 | 0.00 | 0.02 | 0.00 | 0.00 | 0.02 | 0.02 |
| Actinobaculum             | 0.00 | 0.00 | 0.00 | 0.00  | 0.00 | 0.00 | 0.00 | 0.00 | 0.00 | 0.00 | 0.04 | 0.00 | 0.02 | 0.02 |
| Rhodococcus               | 0.00 | 0.00 | 0.00 | 0.00  | 0.00 | 0.00 | 0.00 | 0.02 | 0.00 | 0.00 | 0.00 | 0.00 | 0.00 | 0.00 |
| Gordonia                  | 0.00 | 0.00 | 0.00 | 0.00  | 0.00 | 0.00 | 0.00 | 0.00 | 0.00 | 0.02 | 0.02 | 0.00 | 0.00 | 0.00 |
| Mycobacterium             | 0.00 | 0.00 | 0.00 | 0.12  | 0.05 | 0.03 | 0.00 | 0.00 | 0.02 | 0.09 | 0.09 | 0.02 | 0.11 | 0.05 |
| Corynebacterium           | 0.00 | 0.03 | 0.00 | 0.00  | 0.05 | 0.00 | 0.00 | 0.00 | 0.00 | 0.00 | 0.00 | 0.00 | 0.04 | 0.00 |
| Nocardioides              | 0.06 | 0.00 | 0.05 | 0.02  | 0.02 | 0.03 | 0.00 | 0.02 | 0.00 | 0.00 | 0.07 | 0.11 | 0.08 | 0.05 |
| Aeromicrobium             | 0.00 | 0.00 | 0.03 | 0.00  | 0.02 | 0.08 | 0.00 | 0.00 | 0.00 | 0.00 | 0.02 | 0.02 | 0.02 | 0.02 |
| Marmoricola               | 0.02 | 0.00 | 0.00 | 0.00  | 0.00 | 0.00 | 0.00 | 0.04 | 0.04 | 0.00 | 0.00 | 0.00 | 0.00 | 0.00 |
| Pimelobacter              | 0.02 | 0.00 | 0.05 | 0.00  | 0.00 | 0.03 | 0.00 | 0.00 | 0.00 | 0.00 | 0.02 | 0.00 | 0.00 | 0.02 |
| Bifidobacterium           | 0.15 | 0.30 | 0.38 | 0.51  | 0.05 | 0.30 | 0.43 | 0.11 | 0.20 | 0.02 | 0.07 | 0.11 | 0.17 | 0.36 |
| Paraeggerthella           | 0.00 | 0.00 | 0.00 | 0.00  | 0.00 | 0.00 | 0.00 | 0.00 | 0.00 | 0.00 | 0.00 | 0.00 | 0.00 | 0.02 |
| Asaccharobacter           | 0.00 | 0.00 | 0.00 | 0.00  | 0.00 | 0.00 | 0.03 | 0.00 | 0.00 | 0.00 | 0.00 | 0.00 | 0.02 | 0.00 |
| TM7_genera_incertae_sedis | 0.61 | 0.03 | 0.08 | 0.35  | 0.56 | 0.46 | 0.20 | 0.24 | 0.07 | 1.54 | 0.16 | 0.34 | 0.15 | 0.09 |
| Treponema                 | 0.00 | 0.00 | 0.00 | 0.00  | 0.02 | 0.05 | 0.00 | 0.00 | 0.00 | 0.00 | 0.02 | 0.00 | 0.02 | 0.05 |
| Leptospira                | 0.00 | 0.00 | 0.00 | 0.02  | 0.02 | 0.05 | 0.00 | 0.00 | 0.00 | 0.00 | 0.00 | 0.00 | 0.00 | 0.02 |
| Turneriella               | 1.11 | 0.13 | 0.85 | 1.44  | 0.98 | 1.13 | 0.68 | 0.06 | 0.09 | 0.11 | 0.20 | 0.16 | 0.15 | 0.38 |
| Leptonema                 | 0.00 | 0.00 | 0.00 | 0.02  | 0.00 | 0.00 | 0.00 | 0.00 | 0.00 | 0.00 | 0.00 | 0.00 | 0.00 | 0.00 |
| Marinifilum               | 0.00 | 0.00 | 0.00 | 0.00  | 0.00 | 0.00 | 0.00 | 0.02 | 0.00 | 0.00 | 0.00 | 0.00 | 0.00 | 0.00 |
| Ohtaekwangia              | 0.90 | 0.50 | 0.16 | 10.85 | 3.10 | 1.27 | 0.68 | 0.11 | 0.09 | 0.20 | 0.45 | 0.61 | 0.38 | 0.18 |
| Prolixibacter             | 0.00 | 0.00 | 0.00 | 0.00  | 0.00 | 0.00 | 0.00 | 0.00 | 0.00 | 0.00 | 0.00 | 0.02 | 0.00 | 0.00 |

|                   |      |      |      |       |      |      |      |      |      |      |      |      |      |      |
|-------------------|------|------|------|-------|------|------|------|------|------|------|------|------|------|------|
| Alistipes         | 0.04 | 0.00 | 0.00 | 0.02  | 0.00 | 0.00 | 0.00 | 0.02 | 0.00 | 0.02 | 0.00 | 0.00 | 0.02 | 0.02 |
| Alkaliflexus      | 0.17 | 0.03 | 0.03 | 0.07  | 0.15 | 0.05 | 0.10 | 0.00 | 0.02 | 0.00 | 0.02 | 0.02 | 0.00 | 0.00 |
| Marinilabilia     | 0.00 | 0.00 | 0.00 | 0.00  | 0.02 | 0.00 | 0.00 | 0.00 | 0.00 | 0.00 | 0.00 | 0.00 | 0.02 | 0.00 |
| Prevotella        | 0.35 | 0.00 | 0.30 | 0.07  | 0.78 | 0.11 | 0.08 | 0.02 | 0.00 | 0.04 | 0.04 | 0.07 | 0.02 | 0.00 |
| Xylanibacter      | 0.00 | 0.00 | 0.00 | 0.00  | 0.00 | 0.03 | 0.00 | 0.00 | 0.00 | 0.00 | 0.00 | 0.00 | 0.00 | 0.00 |
| Paraprevotella    | 0.02 | 0.00 | 0.00 | 0.00  | 0.00 | 0.00 | 0.00 | 0.00 | 0.00 | 0.00 | 0.00 | 0.00 | 0.00 | 0.00 |
| Bacteroides       | 0.54 | 0.05 | 0.16 | 1.16  | 0.93 | 0.11 | 0.10 | 0.06 | 0.02 | 0.11 | 0.11 | 0.00 | 0.04 | 0.14 |
| Anaerorhabdus     | 0.00 | 0.00 | 0.00 | 0.00  | 0.00 | 0.00 | 0.00 | 0.00 | 0.00 | 0.00 | 0.00 | 0.00 | 0.02 | 0.00 |
| Proteiniphilum    | 0.02 | 0.00 | 0.00 | 0.00  | 0.00 | 0.00 | 0.00 | 0.00 | 0.00 | 0.02 | 0.13 | 0.11 | 0.04 | 0.07 |
| Paludibacter      | 0.42 | 0.00 | 0.11 | 0.44  | 1.03 | 0.30 | 0.76 | 0.24 | 0.20 | 0.02 | 0.04 | 0.14 | 0.04 | 0.09 |
| Tannerella        | 0.00 | 0.00 | 0.00 | 0.00  | 0.00 | 0.00 | 0.00 | 0.02 | 0.00 | 0.00 | 0.00 | 0.00 | 0.00 | 0.00 |
| Butyricimonas     | 0.00 | 0.00 | 0.00 | 0.00  | 0.02 | 0.00 | 0.00 | 0.00 | 0.00 | 0.00 | 0.00 | 0.00 | 0.00 | 0.00 |
| Dysgonomonas      | 0.02 | 0.00 | 0.00 | 0.00  | 0.05 | 0.00 | 0.00 | 0.00 | 0.00 | 0.00 | 0.00 | 0.00 | 0.00 | 0.00 |
| Barnesiella       | 0.00 | 0.00 | 0.00 | 0.02  | 0.00 | 0.03 | 0.00 | 0.00 | 0.00 | 0.02 | 0.00 | 0.00 | 0.00 | 0.00 |
| Parabacteroides   | 0.94 | 0.23 | 0.27 | 1.44  | 1.42 | 0.16 | 0.23 | 0.07 | 0.04 | 0.11 | 0.09 | 0.16 | 0.00 | 0.05 |
| Petrimonas        | 0.02 | 0.00 | 0.03 | 0.00  | 0.02 | 0.03 | 0.00 | 0.02 | 0.02 | 0.00 | 1.22 | 0.79 | 1.21 | 1.61 |
| Odoribacter       | 0.00 | 0.03 | 0.00 | 0.00  | 0.00 | 0.00 | 0.00 | 0.00 | 0.00 | 0.00 | 0.00 | 0.00 | 0.00 | 0.00 |
| Lewinella         | 1.23 | 0.15 | 1.13 | 3.31  | 3.15 | 0.81 | 0.68 | 2.92 | 0.40 | 0.09 | 1.05 | 0.65 | 0.91 | 1.11 |
| Haliscomenobacter | 0.88 | 0.23 | 1.10 | 15.64 | 2.64 | 1.97 | 0.63 | 0.39 | 0.13 | 0.31 | 1.00 | 0.88 | 1.10 | 1.63 |
| Salisaeta         | 0.02 | 0.00 | 0.00 | 0.00  | 0.00 | 0.00 | 0.00 | 0.00 | 0.00 | 0.00 | 0.04 | 0.00 | 0.00 | 0.00 |
| Leadbetterella    | 0.00 | 0.00 | 0.00 | 0.02  | 0.00 | 0.00 | 0.00 | 0.00 | 0.00 | 0.00 | 0.00 | 0.00 | 0.00 | 0.00 |
| Meniscus          | 0.00 | 0.00 | 0.11 | 0.00  | 0.05 | 0.00 | 0.00 | 0.00 | 0.00 | 0.00 | 0.00 | 0.02 | 0.04 | 0.02 |
| Cytophaga         | 0.04 | 0.15 | 0.00 | 0.02  | 0.00 | 0.00 | 0.00 | 0.00 | 0.02 | 0.00 | 0.00 | 0.00 | 0.02 | 0.00 |
| Flectobacillus    | 0.02 | 0.03 | 0.00 | 0.00  | 0.00 | 0.00 | 0.00 | 0.00 | 0.00 | 0.00 | 0.00 | 0.00 | 0.00 | 0.00 |
| Larkinella        | 0.00 | 0.00 | 0.00 | 0.00  | 0.00 | 0.00 | 0.00 | 0.00 | 0.00 | 0.00 | 0.02 | 0.00 | 0.00 | 0.00 |
| Runella           | 0.00 | 0.05 | 0.05 | 0.81  | 0.10 | 0.08 | 0.00 | 0.02 | 0.00 | 0.00 | 0.00 | 0.02 | 0.00 | 0.00 |





|                  |      |      |      |      |      |      |      |      |      |      |      |      |      |      |
|------------------|------|------|------|------|------|------|------|------|------|------|------|------|------|------|
| Myroides         | 1.06 | 0.00 | 0.27 | 0.00 | 0.05 | 0.00 | 0.03 | 0.00 | 0.00 | 0.00 | 0.11 | 0.05 | 0.04 | 0.02 |
| Wolinella        | 0.02 | 0.00 | 0.00 | 0.00 | 0.00 | 0.00 | 0.00 | 0.00 | 0.00 | 0.00 | 0.00 | 0.00 | 0.00 | 0.00 |
| Sulfurovum       | 0.00 | 0.00 | 0.00 | 0.02 | 0.00 | 0.00 | 0.00 | 0.00 | 0.00 | 0.00 | 0.00 | 0.00 | 0.00 | 0.00 |
| Sulfuricurvum    | 0.06 | 0.00 | 0.00 | 0.09 | 0.00 | 0.00 | 0.00 | 0.00 | 0.00 | 0.00 | 0.00 | 0.00 | 0.00 | 0.02 |
| Campylobacter    | 0.02 | 0.00 | 0.00 | 0.00 | 0.00 | 0.00 | 0.00 | 0.00 | 0.00 | 0.00 | 0.00 | 0.00 | 0.00 | 0.00 |
| Arcobacter       | 0.50 | 0.00 | 0.11 | 0.67 | 0.37 | 0.38 | 0.05 | 0.00 | 0.00 | 0.00 | 0.09 | 0.02 | 0.04 | 0.02 |
| Desulfomonile    | 0.02 | 0.00 | 0.00 | 0.00 | 0.00 | 0.00 | 0.03 | 0.00 | 0.02 | 0.00 | 0.00 | 0.00 | 0.02 | 0.02 |
| Smithella        | 0.02 | 0.00 | 0.03 | 0.00 | 0.02 | 0.00 | 0.08 | 0.06 | 0.00 | 0.09 | 0.00 | 0.02 | 0.08 | 0.07 |
| Desulfobacca     | 0.00 | 0.00 | 0.00 | 0.00 | 0.00 | 0.00 | 0.00 | 0.02 | 0.02 | 0.00 | 0.00 | 0.00 | 0.00 | 0.00 |
| Syntrophus       | 0.00 | 0.00 | 0.00 | 0.00 | 0.00 | 0.00 | 0.00 | 0.00 | 0.00 | 0.00 | 0.00 | 0.07 | 0.02 | 0.05 |
| Syntrophobacter  | 0.00 | 0.03 | 0.00 | 0.00 | 0.00 | 0.00 | 0.00 | 0.00 | 0.00 | 0.00 | 0.02 | 0.07 | 0.04 | 0.00 |
| Desulfomicrobium | 0.21 | 0.03 | 0.19 | 0.07 | 0.10 | 0.05 | 0.08 | 0.00 | 0.02 | 0.09 | 0.07 | 0.02 | 0.02 | 0.00 |
| Bilophila        | 0.00 | 0.00 | 0.03 | 0.00 | 0.00 | 0.03 | 0.00 | 0.00 | 0.00 | 0.00 | 0.00 | 0.00 | 0.00 | 0.00 |
| Desulfovibrio    | 0.02 | 0.00 | 0.00 | 0.05 | 0.24 | 0.08 | 0.03 | 0.00 | 0.00 | 0.11 | 0.02 | 0.02 | 0.04 | 0.05 |
| Bdellovibrio     | 0.61 | 0.73 | 0.22 | 0.74 | 0.44 | 0.46 | 0.18 | 0.07 | 0.18 | 0.11 | 0.38 | 0.36 | 0.36 | 0.29 |
| Vampirovibrio    | 0.06 | 0.00 | 0.00 | 0.02 | 0.00 | 0.00 | 0.00 | 0.00 | 0.00 | 0.00 | 0.00 | 0.00 | 0.00 | 0.00 |
| Peredibacter     | 0.02 | 0.03 | 0.11 | 0.07 | 0.02 | 0.41 | 0.00 | 0.00 | 0.00 | 0.00 | 0.00 | 0.00 | 0.00 | 0.05 |
| Bacteriovorax    | 0.00 | 0.03 | 0.11 | 0.09 | 0.00 | 0.11 | 0.00 | 0.00 | 0.04 | 0.00 | 0.00 | 0.02 | 0.00 | 0.00 |
| Pelobacter       | 0.00 | 0.00 | 0.00 | 0.00 | 0.00 | 0.00 | 0.00 | 0.00 | 0.00 | 0.00 | 0.02 | 0.00 | 0.00 | 0.00 |
| Geobacter        | 0.08 | 0.05 | 0.19 | 0.14 | 0.10 | 0.03 | 0.18 | 0.00 | 0.09 | 0.04 | 0.00 | 0.00 | 0.02 | 0.02 |
| Syntrophorhabdus | 0.23 | 0.00 | 0.11 | 0.00 | 0.02 | 0.03 | 0.15 | 0.00 | 0.07 | 0.07 | 2.96 | 3.02 | 4.02 | 4.32 |
| Desulfobulbus    | 0.19 | 0.03 | 0.41 | 0.19 | 0.39 | 0.57 | 0.10 | 0.02 | 0.11 | 0.09 | 0.33 | 0.32 | 0.21 | 0.34 |
| Desulfocapsa     | 0.00 | 0.00 | 0.05 | 0.02 | 0.00 | 0.00 | 0.05 | 0.00 | 0.00 | 0.00 | 0.00 | 0.02 | 0.00 | 0.00 |
| Desulfonema      | 0.00 | 0.00 | 0.03 | 0.00 | 0.00 | 0.00 | 0.00 | 0.00 | 0.04 | 0.04 | 0.00 | 0.02 | 0.02 | 0.02 |
| Desulfobacter    | 0.02 | 0.03 | 0.05 | 0.05 | 0.00 | 0.05 | 0.08 | 0.02 | 0.02 | 0.00 | 0.00 | 0.02 | 0.02 | 0.02 |
| Desulforegula    | 0.02 | 0.00 | 0.08 | 0.02 | 0.00 | 0.03 | 0.03 | 0.00 | 0.00 | 0.02 | 0.02 | 0.00 | 0.00 | 0.00 |

|                   |      |      |      |      |      |      |      |      |      |      |      |      |      |      |
|-------------------|------|------|------|------|------|------|------|------|------|------|------|------|------|------|
| Desulfatirhabdium | 0.02 | 0.00 | 0.00 | 0.00 | 0.00 | 0.00 | 0.00 | 0.00 | 0.00 | 0.00 | 0.00 | 0.00 | 0.00 | 0.00 |
| Cystobacter       | 0.00 | 0.00 | 0.00 | 0.00 | 0.00 | 0.00 | 0.00 | 0.00 | 0.00 | 0.04 | 0.00 | 0.00 | 0.00 | 0.00 |
| Hyalangium        | 0.04 | 0.13 | 0.00 | 0.00 | 0.00 | 0.11 | 0.00 | 0.00 | 0.02 | 0.00 | 0.00 | 0.00 | 0.00 | 0.02 |
| Anaeromyxobacter  | 0.19 | 0.03 | 0.63 | 0.12 | 0.10 | 0.08 | 0.08 | 0.11 | 0.13 | 2.23 | 0.22 | 0.29 | 0.13 | 0.32 |
| Pyxidicoccus      | 0.00 | 0.00 | 0.00 | 0.02 | 0.00 | 0.00 | 0.00 | 0.00 | 0.00 | 0.00 | 0.00 | 0.00 | 0.00 | 0.00 |
| Kofleria          | 0.02 | 0.03 | 0.03 | 0.02 | 0.05 | 0.03 | 0.00 | 0.00 | 0.00 | 0.02 | 0.00 | 0.00 | 0.00 | 0.00 |
| Nannocystis       | 0.06 | 0.08 | 0.08 | 0.53 | 1.20 | 0.62 | 0.51 | 0.04 | 0.00 | 0.00 | 0.38 | 0.27 | 0.15 | 0.07 |
| Plesiocystis      | 0.00 | 0.03 | 0.00 | 0.00 | 0.07 | 0.00 | 0.05 | 0.00 | 0.00 | 0.00 | 0.00 | 0.00 | 0.06 | 0.00 |
| Haliangium        | 0.00 | 0.00 | 0.00 | 0.00 | 0.05 | 0.00 | 0.08 | 0.00 | 0.00 | 0.02 | 0.00 | 0.07 | 0.08 | 0.02 |
| Phaselicystis     | 0.00 | 0.00 | 0.03 | 0.00 | 0.00 | 0.03 | 0.00 | 0.00 | 0.00 | 0.16 | 0.00 | 0.00 | 0.00 | 0.02 |
| Chondromyces      | 0.38 | 0.30 | 0.33 | 0.30 | 0.15 | 0.14 | 0.35 | 0.02 | 0.04 | 0.45 | 0.18 | 0.20 | 0.11 | 0.09 |
| Sorangium         | 0.00 | 0.00 | 0.03 | 0.02 | 0.00 | 0.00 | 0.00 | 0.00 | 0.00 | 0.00 | 0.00 | 0.00 | 0.00 | 0.00 |
| Byssovorax        | 0.40 | 0.15 | 0.19 | 1.97 | 0.59 | 1.81 | 1.49 | 0.07 | 0.07 | 0.31 | 0.18 | 0.25 | 0.21 | 0.23 |
| Nitrosomonas      | 0.27 | 0.43 | 0.22 | 0.05 | 0.00 | 0.22 | 0.08 | 0.09 | 0.20 | 0.04 | 0.24 | 0.29 | 0.13 | 0.18 |
| Nitrosospira      | 0.15 | 0.00 | 0.25 | 0.05 | 0.00 | 0.00 | 0.03 | 0.02 | 0.07 | 0.04 | 0.11 | 0.14 | 0.15 | 0.16 |
| Leptothrix        | 0.00 | 0.00 | 0.00 | 0.00 | 0.00 | 0.03 | 0.00 | 0.00 | 0.00 | 0.00 | 0.00 | 0.00 | 0.00 | 0.00 |
| Paucibacter       | 0.00 | 0.00 | 0.00 | 0.00 | 0.00 | 0.00 | 0.00 | 0.02 | 0.00 | 0.00 | 0.00 | 0.00 | 0.00 | 0.02 |
| Tepidimonas       | 0.00 | 0.00 | 0.00 | 0.00 | 0.02 | 0.00 | 0.05 | 0.00 | 0.02 | 0.00 | 0.00 | 0.00 | 0.02 | 0.00 |
| Piscinibacter     | 0.42 | 0.03 | 0.38 | 0.00 | 0.05 | 0.05 | 0.30 | 0.30 | 0.40 | 0.45 | 0.27 | 0.36 | 0.25 | 0.18 |
| Aquabacterium     | 0.50 | 0.25 | 1.13 | 1.07 | 1.17 | 3.35 | 4.45 | 0.13 | 0.25 | 0.07 | 0.69 | 0.56 | 0.42 | 0.29 |
| Aquincola         | 0.00 | 0.00 | 0.00 | 0.02 | 0.00 | 0.00 | 0.00 | 0.00 | 0.00 | 0.00 | 0.00 | 0.00 | 0.02 | 0.00 |
| Rubrivivax        | 0.02 | 0.03 | 0.00 | 0.00 | 0.00 | 0.00 | 0.03 | 0.02 | 0.02 | 0.07 | 0.00 | 0.02 | 0.00 | 0.02 |
| Sphaerotilus      | 0.00 | 0.13 | 0.03 | 0.09 | 0.00 | 0.03 | 0.00 | 0.00 | 0.02 | 0.00 | 0.00 | 0.02 | 0.00 | 0.00 |
| Thiomonas         | 0.00 | 0.00 | 0.00 | 0.00 | 0.02 | 0.00 | 0.00 | 0.00 | 0.02 | 0.00 | 0.02 | 0.02 | 0.00 | 0.00 |
| Inhella           | 0.04 | 0.00 | 0.00 | 0.05 | 0.07 | 0.16 | 0.00 | 0.00 | 0.00 | 0.02 | 0.00 | 0.02 | 0.00 | 0.02 |
| Thiobacter        | 0.02 | 0.03 | 0.05 | 0.16 | 0.02 | 0.00 | 0.13 | 0.07 | 0.04 | 0.18 | 0.02 | 0.05 | 0.02 | 0.05 |



|                   |      |      |      |      |      |      |      |      |      |      |      |      |      |      |
|-------------------|------|------|------|------|------|------|------|------|------|------|------|------|------|------|
| Diaphorobacter    | 0.02 | 0.00 | 0.33 | 0.12 | 0.02 | 0.19 | 0.51 | 0.41 | 0.07 | 0.16 | 0.18 | 0.34 | 0.19 | 0.29 |
| Acidovorax        | 0.00 | 0.00 | 0.19 | 0.02 | 0.15 | 0.05 | 0.30 | 0.04 | 0.09 | 0.04 | 0.18 | 0.18 | 0.21 | 0.00 |
| Pseudacidovorax   | 0.13 | 0.00 | 0.03 | 0.00 | 0.00 | 0.03 | 0.10 | 0.00 | 0.07 | 0.00 | 0.02 | 0.00 | 0.06 | 0.00 |
| Malikia           | 0.00 | 0.00 | 0.00 | 0.00 | 0.00 | 0.03 | 0.00 | 0.00 | 0.00 | 0.00 | 0.00 | 0.00 | 0.00 | 0.00 |
| Rhodoferax        | 0.00 | 0.03 | 0.08 | 0.00 | 0.05 | 0.14 | 0.08 | 0.00 | 0.00 | 0.00 | 0.04 | 0.02 | 0.00 | 0.02 |
| Xenophilus        | 0.00 | 0.00 | 0.00 | 0.00 | 0.00 | 0.03 | 0.00 | 0.00 | 0.00 | 0.00 | 0.00 | 0.00 | 0.00 | 0.00 |
| Hydrogenophaga    | 0.00 | 0.10 | 0.00 | 0.02 | 0.10 | 0.00 | 0.03 | 0.06 | 0.02 | 0.02 | 0.07 | 0.09 | 0.04 | 0.02 |
| Macromonas        | 0.00 | 0.08 | 0.00 | 0.14 | 0.00 | 0.00 | 0.00 | 0.02 | 0.00 | 0.00 | 0.00 | 0.00 | 0.00 | 0.00 |
| Variovorax        | 0.00 | 0.00 | 0.08 | 0.07 | 0.73 | 0.05 | 0.30 | 0.00 | 0.11 | 0.04 | 0.07 | 0.07 | 0.06 | 0.09 |
| Limnohabitans     | 0.06 | 0.03 | 0.19 | 0.09 | 0.10 | 0.14 | 0.30 | 0.00 | 0.16 | 0.07 | 0.07 | 0.07 | 0.04 | 0.00 |
| Polaromonas       | 0.00 | 0.00 | 0.00 | 0.02 | 0.05 | 0.00 | 0.03 | 0.00 | 0.00 | 0.00 | 0.02 | 0.00 | 0.00 | 0.00 |
| Sulfuricella      | 0.00 | 0.00 | 0.00 | 0.00 | 0.00 | 0.00 | 0.00 | 0.00 | 0.02 | 0.00 | 0.00 | 0.00 | 0.00 | 0.00 |
| Tepidiphilus      | 0.00 | 0.00 | 0.00 | 0.00 | 0.00 | 0.00 | 0.00 | 0.02 | 0.00 | 0.00 | 0.00 | 0.00 | 0.00 | 0.00 |
| Thiobacillus      | 0.08 | 0.00 | 0.00 | 0.00 | 0.00 | 0.00 | 0.00 | 0.02 | 0.27 | 0.04 | 0.11 | 0.05 | 0.08 | 0.02 |
| Methylotenera     | 0.00 | 0.00 | 0.00 | 0.07 | 0.00 | 0.03 | 0.00 | 0.00 | 0.00 | 0.00 | 0.04 | 0.02 | 0.00 | 0.00 |
| Methylophilus     | 0.00 | 0.00 | 0.00 | 0.70 | 0.20 | 0.00 | 0.00 | 0.00 | 0.00 | 0.00 | 0.29 | 0.20 | 0.25 | 0.02 |
| Formivibrio       | 0.02 | 0.03 | 0.11 | 0.00 | 0.02 | 0.03 | 0.15 | 0.07 | 0.47 | 0.04 | 0.07 | 0.20 | 0.02 | 0.07 |
| Laribacter        | 0.00 | 0.00 | 0.00 | 0.00 | 0.02 | 0.03 | 0.00 | 0.00 | 0.00 | 0.00 | 0.00 | 0.00 | 0.00 | 0.00 |
| Aquaspirillum     | 0.02 | 0.00 | 0.00 | 0.00 | 0.00 | 0.00 | 0.00 | 0.00 | 0.00 | 0.00 | 0.00 | 0.00 | 0.00 | 0.00 |
| Gulbenkiania      | 0.00 | 0.00 | 0.00 | 0.00 | 0.00 | 0.00 | 0.00 | 0.00 | 0.02 | 0.00 | 0.00 | 0.00 | 0.00 | 0.00 |
| Uruburuella       | 0.00 | 0.00 | 0.00 | 0.00 | 0.00 | 0.00 | 0.00 | 0.00 | 0.00 | 0.00 | 0.02 | 0.00 | 0.00 | 0.00 |
| Vogesella         | 0.00 | 0.00 | 0.03 | 0.00 | 0.00 | 0.00 | 0.00 | 0.00 | 0.00 | 0.00 | 0.02 | 0.00 | 0.00 | 0.00 |
| Methyloversatilis | 0.23 | 0.00 | 0.14 | 0.56 | 0.05 | 0.00 | 0.08 | 0.02 | 0.00 | 0.00 | 0.02 | 0.07 | 0.04 | 0.00 |
| Dechloromonas     | 2.05 | 2.33 | 1.26 | 0.19 | 1.39 | 1.78 | 4.27 | 0.41 | 1.48 | 0.51 | 0.82 | 0.93 | 0.68 | 0.36 |
| Sterolibacterium  | 0.02 | 0.03 | 0.14 | 0.02 | 0.00 | 0.00 | 0.03 | 0.06 | 0.11 | 0.74 | 0.09 | 0.20 | 0.06 | 0.05 |
| Georgfuchsia      | 0.02 | 0.00 | 0.03 | 0.00 | 0.00 | 0.03 | 0.30 | 0.02 | 0.16 | 0.09 | 0.07 | 0.00 | 0.00 | 0.00 |

|                    |      |      |      |      |      |       |      |      |      |      |      |      |      |      |
|--------------------|------|------|------|------|------|-------|------|------|------|------|------|------|------|------|
| Ferribacterium     | 0.50 | 0.00 | 0.03 | 0.00 | 0.02 | 4.78  | 0.00 | 0.02 | 0.00 | 0.00 | 0.09 | 0.09 | 0.08 | 0.00 |
| Shinella           | 0.02 | 0.00 | 0.00 | 0.00 | 0.02 | 0.05  | 0.00 | 0.00 | 0.00 | 0.00 | 0.00 | 0.02 | 0.02 | 0.00 |
| Thauera            | 0.46 | 0.20 | 1.02 | 1.44 | 0.73 | 0.86  | 4.20 | 0.35 | 0.36 | 2.72 | 1.18 | 1.99 | 1.10 | 0.95 |
| Propionivibrio     | 0.02 | 0.00 | 0.11 | 0.07 | 0.07 | 0.08  | 0.18 | 0.00 | 0.04 | 0.00 | 0.00 | 0.00 | 0.04 | 0.02 |
| Denitratisoma      | 0.04 | 0.00 | 0.19 | 0.00 | 0.02 | 0.03  | 0.03 | 0.17 | 0.42 | 0.20 | 0.22 | 0.32 | 0.40 | 0.02 |
| Uliginosibacterium | 0.00 | 0.00 | 0.00 | 0.00 | 0.00 | 0.00  | 0.03 | 0.00 | 0.00 | 0.00 | 0.00 | 0.00 | 0.00 | 0.00 |
| Rhodocyclus        | 0.02 | 0.00 | 0.03 | 0.00 | 0.05 | 0.00  | 0.03 | 0.00 | 0.00 | 0.00 | 0.00 | 0.00 | 0.00 | 0.00 |
| Zoogloea           | 3.03 | 3.33 | 4.34 | 0.35 | 2.54 | 11.53 | 2.40 | 1.65 | 0.47 | 0.07 | 1.38 | 1.29 | 1.14 | 0.86 |
| Azoarcus           | 1.17 | 0.25 | 2.01 | 0.07 | 0.02 | 0.08  | 0.38 | 0.09 | 0.09 | 0.07 | 0.27 | 0.29 | 0.08 | 0.07 |
| Azonexus           | 0.00 | 0.00 | 0.00 | 0.05 | 0.02 | 0.00  | 0.00 | 0.00 | 0.00 | 0.00 | 0.07 | 0.05 | 0.06 | 0.05 |
| Azospira           | 0.00 | 0.00 | 0.00 | 0.02 | 0.22 | 0.00  | 0.61 | 0.04 | 0.09 | 0.00 | 0.13 | 0.07 | 0.11 | 0.09 |
| Sulfuritalea       | 0.44 | 0.25 | 0.44 | 0.19 | 0.32 | 0.68  | 1.47 | 0.04 | 0.07 | 0.02 | 0.16 | 0.14 | 0.13 | 0.02 |
| Azovibrio          | 0.00 | 0.00 | 0.00 | 0.00 | 0.00 | 0.00  | 0.00 | 0.02 | 0.00 | 0.00 | 0.02 | 0.00 | 0.00 | 0.02 |
| Geminicoccus       | 0.00 | 0.00 | 0.00 | 0.00 | 0.00 | 0.05  | 0.00 | 0.00 | 0.00 | 0.00 | 0.00 | 0.02 | 0.02 | 0.00 |
| Elioraea           | 0.04 | 0.00 | 0.00 | 0.00 | 0.00 | 0.00  | 0.00 | 0.02 | 0.20 | 0.07 | 0.02 | 0.09 | 0.04 | 0.05 |
| Rhizomicrobium     | 0.71 | 5.95 | 0.44 | 0.25 | 0.39 | 0.08  | 0.08 | 0.07 | 0.09 | 0.04 | 0.09 | 0.05 | 0.11 | 0.07 |
| Rhodopseudomonas   | 0.00 | 0.00 | 0.05 | 0.02 | 0.00 | 0.00  | 0.00 | 0.00 | 0.00 | 0.00 | 0.02 | 0.00 | 0.00 | 0.02 |
| Bradyrhizobium     | 0.42 | 0.03 | 0.44 | 0.00 | 0.00 | 0.24  | 0.03 | 0.09 | 0.49 | 0.69 | 0.87 | 0.86 | 0.85 | 0.86 |
| Afipia             | 1.09 | 0.45 | 0.88 | 0.39 | 0.27 | 0.22  | 0.23 | 0.15 | 0.07 | 0.04 | 1.20 | 0.59 | 0.83 | 0.70 |
| Bosea              | 0.04 | 0.00 | 0.05 | 0.02 | 0.00 | 0.00  | 0.00 | 0.00 | 0.07 | 0.04 | 0.00 | 0.02 | 0.00 | 0.02 |
| Nitrobacter        | 0.15 | 0.03 | 0.30 | 0.00 | 0.02 | 0.11  | 0.05 | 0.11 | 0.31 | 0.11 | 0.20 | 0.20 | 0.17 | 0.29 |
| Agromonas          | 0.00 | 0.00 | 0.00 | 0.00 | 0.00 | 0.00  | 0.00 | 0.00 | 0.02 | 0.00 | 0.00 | 0.00 | 0.00 | 0.00 |
| Oligotropha        | 0.02 | 0.08 | 0.05 | 0.05 | 0.00 | 0.00  | 0.00 | 0.04 | 0.00 | 0.00 | 0.11 | 0.09 | 0.06 | 0.05 |
| Kaistia            | 0.00 | 0.03 | 0.00 | 0.00 | 0.02 | 0.03  | 0.00 | 0.00 | 0.00 | 0.07 | 0.00 | 0.00 | 0.04 | 0.00 |
| Rhizobium          | 0.02 | 0.00 | 0.00 | 0.00 | 0.00 | 0.00  | 0.00 | 0.00 | 0.00 | 0.02 | 0.00 | 0.02 | 0.00 | 0.00 |
| Ensifer            | 0.00 | 0.00 | 0.03 | 0.02 | 0.00 | 0.00  | 0.03 | 0.07 | 0.04 | 0.09 | 0.11 | 0.07 | 0.11 | 0.09 |

|                  |      |      |      |      |      |      |      |      |      |      |      |      |      |      |
|------------------|------|------|------|------|------|------|------|------|------|------|------|------|------|------|
| Methylocystis    | 0.08 | 0.00 | 0.22 | 0.00 | 0.02 | 0.05 | 0.00 | 0.20 | 0.07 | 0.09 | 0.27 | 0.29 | 0.42 | 0.32 |
| Methylopila      | 0.00 | 0.00 | 0.00 | 0.00 | 0.00 | 0.00 | 0.00 | 0.00 | 0.00 | 0.02 | 0.00 | 0.00 | 0.02 | 0.00 |
| Hansschlegelia   | 0.00 | 0.00 | 0.00 | 0.00 | 0.00 | 0.00 | 0.00 | 0.00 | 0.00 | 0.00 | 0.02 | 0.00 | 0.00 | 0.00 |
| Methylocapsa     | 0.00 | 0.00 | 0.05 | 0.05 | 0.02 | 0.03 | 0.00 | 0.00 | 0.04 | 0.04 | 0.02 | 0.02 | 0.02 | 0.02 |
| Methylocella     | 0.00 | 0.00 | 0.00 | 0.00 | 0.00 | 0.00 | 0.00 | 0.00 | 0.00 | 0.04 | 0.00 | 0.02 | 0.04 | 0.00 |
| Chelatococcus    | 0.00 | 0.00 | 0.00 | 0.00 | 0.00 | 0.00 | 0.00 | 0.00 | 0.00 | 0.00 | 0.02 | 0.02 | 0.00 | 0.00 |
| Methylovirgula   | 0.00 | 0.00 | 0.00 | 0.00 | 0.00 | 0.00 | 0.00 | 0.00 | 0.00 | 0.00 | 0.02 | 0.00 | 0.00 | 0.00 |
| Mesorhizobium    | 0.02 | 0.00 | 0.03 | 0.00 | 0.00 | 0.03 | 0.00 | 0.00 | 0.11 | 0.07 | 0.02 | 0.05 | 0.00 | 0.02 |
| Aminobacter      | 0.06 | 0.05 | 0.00 | 0.00 | 0.00 | 0.00 | 0.00 | 0.00 | 0.00 | 0.00 | 0.00 | 0.00 | 0.02 | 0.00 |
| Anderseniella    | 0.04 | 0.10 | 0.00 | 0.02 | 0.02 | 0.00 | 0.13 | 0.13 | 0.04 | 0.09 | 0.27 | 0.23 | 0.34 | 0.32 |
| Brucella         | 0.00 | 0.00 | 0.00 | 0.00 | 0.00 | 0.00 | 0.00 | 0.02 | 0.00 | 0.00 | 0.00 | 0.00 | 0.00 | 0.00 |
| Ochrobactrum     | 0.00 | 0.00 | 0.00 | 0.00 | 0.00 | 0.00 | 0.00 | 0.06 | 0.00 | 0.00 | 0.00 | 0.00 | 0.00 | 0.02 |
| Bauldia          | 0.00 | 0.03 | 0.00 | 0.00 | 0.00 | 0.00 | 0.00 | 0.00 | 0.00 | 0.09 | 0.00 | 0.00 | 0.00 | 0.05 |
| Amorphus         | 0.00 | 0.00 | 0.00 | 0.00 | 0.00 | 0.00 | 0.00 | 0.02 | 0.02 | 0.00 | 0.00 | 0.00 | 0.04 | 0.02 |
| Vasilyevaea      | 0.00 | 0.03 | 0.00 | 0.00 | 0.00 | 0.08 | 0.03 | 0.00 | 0.07 | 0.02 | 0.02 | 0.02 | 0.00 | 0.02 |
| Xanthobacter     | 0.00 | 0.00 | 0.00 | 0.02 | 0.00 | 0.03 | 0.00 | 0.02 | 0.00 | 0.00 | 0.00 | 0.00 | 0.00 | 0.00 |
| Pseudolabrys     | 0.00 | 0.13 | 0.19 | 0.16 | 0.00 | 0.08 | 0.03 | 0.02 | 0.07 | 0.02 | 0.38 | 0.14 | 0.19 | 0.07 |
| Methylobacterium | 0.00 | 0.00 | 0.00 | 0.00 | 0.00 | 0.00 | 0.03 | 0.00 | 0.00 | 0.00 | 0.00 | 0.00 | 0.02 | 0.00 |
| Hyphomicrobium   | 0.96 | 0.10 | 1.65 | 1.69 | 0.17 | 0.08 | 0.23 | 1.06 | 0.74 | 3.73 | 3.89 | 3.43 | 4.30 | 2.96 |
| Rhodoplanes      | 0.02 | 0.03 | 0.03 | 0.00 | 0.00 | 0.00 | 0.00 | 0.00 | 0.00 | 0.00 | 0.00 | 0.02 | 0.00 | 0.00 |
| Gemmiger         | 0.00 | 0.00 | 0.03 | 0.02 | 0.02 | 0.00 | 0.13 | 0.00 | 0.00 | 0.02 | 0.00 | 0.02 | 0.00 | 0.02 |
| Filomicrobium    | 0.29 | 0.03 | 0.58 | 0.02 | 0.00 | 0.00 | 0.05 | 0.48 | 0.42 | 1.56 | 0.60 | 0.59 | 0.40 | 0.68 |
| Devosia          | 0.17 | 0.05 | 0.30 | 0.21 | 0.32 | 0.35 | 0.45 | 0.06 | 0.09 | 0.13 | 0.16 | 0.16 | 0.11 | 0.16 |
| Blastochloris    | 0.02 | 0.03 | 0.05 | 0.07 | 0.02 | 0.00 | 0.00 | 0.00 | 0.09 | 0.00 | 0.02 | 0.09 | 0.06 | 0.07 |
| Pedomicrobium    | 0.40 | 0.03 | 0.74 | 0.16 | 0.42 | 0.11 | 0.05 | 0.04 | 0.02 | 0.09 | 1.78 | 1.67 | 1.35 | 1.18 |
| Parvularcula     | 0.00 | 0.00 | 0.00 | 0.00 | 0.05 | 0.00 | 0.00 | 0.00 | 0.00 | 0.00 | 0.00 | 0.02 | 0.00 | 0.02 |

|                    |      |      |      |      |      |      |      |      |      |      |      |      |      |      |
|--------------------|------|------|------|------|------|------|------|------|------|------|------|------|------|------|
| Hyphomonas         | 0.04 | 0.03 | 0.03 | 0.00 | 0.00 | 0.00 | 0.00 | 0.00 | 0.00 | 0.04 | 0.07 | 0.05 | 0.00 | 0.00 |
| Caulobacter        | 0.00 | 0.03 | 0.05 | 0.07 | 0.17 | 0.14 | 0.18 | 0.04 | 0.00 | 0.00 | 0.04 | 0.02 | 0.00 | 0.00 |
| Brevundimonas      | 0.42 | 0.03 | 0.91 | 0.58 | 0.88 | 0.22 | 0.00 | 0.80 | 0.56 | 0.27 | 0.22 | 0.36 | 0.25 | 0.20 |
| Phenyllobacterium  | 0.48 | 0.40 | 0.85 | 0.19 | 0.37 | 0.46 | 0.13 | 0.59 | 0.31 | 0.51 | 0.42 | 0.45 | 0.47 | 0.32 |
| Anaplasma          | 0.00 | 0.00 | 0.00 | 0.00 | 0.00 | 0.00 | 0.03 | 0.00 | 0.00 | 0.00 | 0.00 | 0.00 | 0.00 | 0.00 |
| Rickettsia         | 0.15 | 0.03 | 0.03 | 0.07 | 0.12 | 0.00 | 0.03 | 0.00 | 0.07 | 0.16 | 0.00 | 0.02 | 0.04 | 0.02 |
| Orientia           | 0.00 | 0.00 | 0.00 | 0.00 | 0.05 | 0.00 | 0.00 | 0.00 | 0.00 | 0.00 | 0.00 | 0.00 | 0.00 | 0.00 |
| Blastomonas        | 0.00 | 0.00 | 0.03 | 0.00 | 0.00 | 0.00 | 0.00 | 0.00 | 0.00 | 0.04 | 0.00 | 0.07 | 0.00 | 0.00 |
| Sandaracinobacter  | 0.00 | 0.00 | 0.00 | 0.00 | 0.02 | 0.00 | 0.00 | 0.00 | 0.00 | 0.00 | 0.00 | 0.00 | 0.00 | 0.00 |
| Sphingomonas       | 1.27 | 0.05 | 1.07 | 0.30 | 0.68 | 0.16 | 0.03 | 1.13 | 0.34 | 2.10 | 1.20 | 1.24 | 1.44 | 1.20 |
| Sphingopyxis       | 0.00 | 0.00 | 0.00 | 0.02 | 0.00 | 0.00 | 0.00 | 0.00 | 0.00 | 0.07 | 0.07 | 0.02 | 0.06 | 0.02 |
| Novosphingobium    | 0.08 | 0.00 | 0.85 | 0.02 | 0.07 | 0.00 | 0.18 | 0.31 | 0.89 | 1.23 | 0.47 | 0.63 | 0.61 | 0.45 |
| Sandarakinorhabdus | 0.00 | 0.00 | 0.00 | 0.00 | 0.02 | 0.00 | 0.00 | 0.00 | 0.00 | 0.00 | 0.00 | 0.02 | 0.00 | 0.00 |
| Sphingosinicella   | 0.00 | 0.00 | 0.11 | 0.00 | 0.02 | 0.00 | 0.00 | 0.02 | 0.02 | 0.47 | 0.04 | 0.11 | 0.08 | 0.14 |
| Sphingobium        | 0.02 | 0.03 | 0.16 | 0.07 | 1.56 | 0.03 | 0.05 | 0.09 | 0.11 | 0.56 | 0.09 | 0.20 | 0.08 | 0.11 |
| Altererythrobacter | 0.02 | 0.00 | 0.05 | 0.00 | 0.00 | 0.00 | 0.00 | 0.00 | 0.04 | 0.02 | 0.00 | 0.02 | 0.00 | 0.00 |
| Erythrobacter      | 0.00 | 0.00 | 0.00 | 0.02 | 0.00 | 0.00 | 0.00 | 0.00 | 0.00 | 0.00 | 0.00 | 0.00 | 0.00 | 0.00 |
| Croceicoccus       | 0.00 | 0.00 | 0.00 | 0.00 | 0.00 | 0.00 | 0.00 | 0.06 | 0.00 | 0.00 | 0.02 | 0.00 | 0.02 | 0.00 |
| Dongia             | 0.04 | 0.28 | 0.00 | 0.12 | 0.02 | 0.19 | 0.10 | 0.00 | 0.00 | 0.00 | 0.00 | 0.02 | 0.00 | 0.02 |
| Tistlia            | 0.00 | 0.00 | 0.05 | 0.00 | 0.00 | 0.00 | 0.00 | 0.00 | 0.00 | 0.00 | 0.02 | 0.00 | 0.00 | 0.02 |
| Pelagibius         | 0.04 | 0.05 | 0.05 | 0.00 | 0.05 | 0.00 | 0.00 | 0.00 | 0.00 | 0.00 | 0.00 | 0.02 | 0.00 | 0.00 |
| Nisaea             | 0.00 | 0.00 | 0.00 | 0.00 | 0.00 | 0.00 | 0.00 | 0.00 | 0.00 | 0.00 | 0.00 | 0.00 | 0.02 | 0.00 |
| Skermanella        | 0.00 | 0.88 | 0.00 | 0.05 | 0.00 | 0.00 | 0.03 | 0.00 | 0.00 | 0.00 | 0.00 | 0.02 | 0.00 | 0.00 |
| Defluviicoccus     | 0.00 | 0.00 | 0.00 | 0.00 | 0.00 | 0.00 | 0.00 | 0.00 | 0.00 | 0.02 | 0.00 | 0.02 | 0.00 | 0.00 |
| Inquilinus         | 0.02 | 0.05 | 0.00 | 0.00 | 0.00 | 0.00 | 0.00 | 0.00 | 0.02 | 0.00 | 0.02 | 0.02 | 0.00 | 0.00 |
| Fodinicurvata      | 0.00 | 0.00 | 0.00 | 0.00 | 0.00 | 0.00 | 0.00 | 0.00 | 0.09 | 0.16 | 0.00 | 0.09 | 0.02 | 0.02 |



|                   |      |      |      |      |      |      |      |      |      |      |      |      |      |      |
|-------------------|------|------|------|------|------|------|------|------|------|------|------|------|------|------|
| Tistrella         | 0.00 | 0.00 | 0.00 | 0.02 | 0.00 | 0.00 | 0.00 | 0.00 | 0.00 | 0.00 | 0.00 | 0.02 | 0.02 | 0.00 |
| Insolitispirillum | 0.00 | 0.00 | 0.00 | 0.05 | 0.00 | 0.00 | 0.00 | 0.00 | 0.02 | 0.00 | 0.00 | 0.00 | 0.00 | 0.00 |
| Acidiphilium      | 0.00 | 0.05 | 0.00 | 0.00 | 0.00 | 0.00 | 0.00 | 0.00 | 0.00 | 0.00 | 0.00 | 0.00 | 0.00 | 0.00 |
| Stella            | 0.04 | 0.13 | 0.00 | 0.02 | 0.02 | 0.00 | 0.10 | 0.00 | 0.00 | 0.02 | 0.02 | 0.00 | 0.00 | 0.02 |
| Acidisoma         | 0.00 | 0.08 | 0.00 | 0.05 | 0.00 | 0.03 | 0.00 | 0.00 | 0.00 | 0.04 | 0.00 | 0.00 | 0.00 | 0.00 |
| Rhodopila         | 0.04 | 0.05 | 0.03 | 0.05 | 0.00 | 0.30 | 0.00 | 0.06 | 0.07 | 0.00 | 0.02 | 0.05 | 0.02 | 0.00 |
| Roseomonas        | 0.06 | 0.65 | 0.71 | 0.46 | 0.00 | 0.70 | 0.23 | 0.24 | 2.44 | 1.56 | 0.56 | 0.56 | 0.40 | 0.34 |
| Acidicaldus       | 0.00 | 0.00 | 0.00 | 0.02 | 0.00 | 0.00 | 0.00 | 0.00 | 0.00 | 0.00 | 0.00 | 0.00 | 0.00 | 0.00 |
| Maribius          | 0.00 | 0.00 | 0.00 | 0.00 | 0.00 | 0.00 | 0.00 | 0.00 | 0.02 | 0.00 | 0.00 | 0.00 | 0.00 | 0.00 |
| Albidovulum       | 0.06 | 0.00 | 0.08 | 0.02 | 0.02 | 0.00 | 0.00 | 0.17 | 0.02 | 0.02 | 0.07 | 0.25 | 0.23 | 0.05 |
| Rhodobacter       | 0.33 | 0.00 | 1.24 | 0.46 | 0.46 | 0.05 | 0.30 | 0.63 | 0.13 | 0.25 | 1.05 | 0.97 | 1.21 | 1.02 |
| Haematobacter     | 0.02 | 0.00 | 0.00 | 0.00 | 0.00 | 0.00 | 0.00 | 0.02 | 0.02 | 0.02 | 0.00 | 0.00 | 0.02 | 0.00 |
| Pontibaca         | 0.00 | 0.00 | 0.00 | 0.00 | 0.00 | 0.00 | 0.00 | 0.00 | 0.00 | 0.00 | 0.00 | 0.00 | 0.02 | 0.00 |
| Paracoccus        | 0.21 | 0.00 | 0.69 | 0.07 | 0.12 | 0.08 | 0.13 | 0.44 | 0.22 | 0.78 | 0.60 | 0.84 | 0.68 | 0.70 |
| Salipiger         | 0.00 | 0.00 | 0.00 | 0.00 | 0.02 | 0.00 | 0.00 | 0.00 | 0.00 | 0.00 | 0.00 | 0.00 | 0.00 | 0.00 |
| Gemmobacter       | 0.00 | 0.00 | 0.03 | 0.00 | 0.00 | 0.00 | 0.03 | 0.00 | 0.02 | 0.02 | 0.00 | 0.05 | 0.00 | 0.00 |
| Catellibacterium  | 0.77 | 0.03 | 1.07 | 0.28 | 0.54 | 0.49 | 0.10 | 0.26 | 0.04 | 0.25 | 0.65 | 0.56 | 0.68 | 0.97 |
| Amaricoccus       | 0.00 | 0.00 | 0.00 | 0.00 | 0.00 | 0.00 | 0.00 | 0.00 | 0.00 | 0.00 | 0.00 | 0.02 | 0.00 | 0.00 |
| Salinihabitans    | 0.00 | 0.00 | 0.00 | 0.00 | 0.00 | 0.00 | 0.00 | 0.00 | 0.00 | 0.00 | 0.00 | 0.02 | 0.00 | 0.00 |
| Arenicella        | 0.00 | 0.00 | 0.00 | 0.00 | 0.00 | 0.00 | 0.00 | 0.00 | 0.02 | 0.00 | 0.00 | 0.00 | 0.00 | 0.00 |
| Thiohalomonas     | 0.00 | 0.05 | 0.00 | 0.00 | 0.00 | 0.00 | 0.00 | 0.00 | 0.00 | 0.00 | 0.00 | 0.00 | 0.00 | 0.00 |
| Thiopfundum       | 0.02 | 0.00 | 0.00 | 0.02 | 0.00 | 0.00 | 0.00 | 0.00 | 0.00 | 0.00 | 0.00 | 0.00 | 0.00 | 0.00 |
| Dasania           | 0.00 | 0.00 | 0.00 | 0.00 | 0.00 | 0.00 | 0.03 | 0.00 | 0.00 | 0.00 | 0.02 | 0.00 | 0.02 | 0.00 |
| Perlucidibaca     | 0.04 | 0.05 | 0.05 | 0.12 | 0.02 | 0.03 | 0.03 | 0.04 | 0.00 | 0.02 | 0.00 | 0.00 | 0.00 | 0.05 |
| Acinetobacter     | 0.50 | 0.28 | 0.71 | 1.09 | 1.51 | 1.67 | 0.51 | 0.00 | 0.09 | 0.00 | 0.80 | 0.47 | 0.68 | 1.20 |
| Enhydrobacter     | 0.00 | 0.00 | 0.03 | 0.00 | 0.00 | 0.08 | 0.08 | 0.02 | 0.00 | 0.00 | 0.02 | 0.02 | 0.00 | 0.05 |



|                     |      |      |      |      |      |      |      |      |      |      |      |      |      |      |
|---------------------|------|------|------|------|------|------|------|------|------|------|------|------|------|------|
| Lysobacter          | 0.25 | 0.08 | 0.38 | 0.32 | 0.05 | 0.05 | 1.21 | 0.28 | 0.09 | 0.02 | 0.27 | 0.29 | 0.21 | 0.27 |
| Xylella             | 0.00 | 0.00 | 0.03 | 0.00 | 0.00 | 0.00 | 0.00 | 0.04 | 0.00 | 0.00 | 0.00 | 0.00 | 0.00 | 0.00 |
| Fulvimonas          | 0.31 | 0.10 | 1.26 | 0.02 | 0.17 | 0.54 | 0.71 | 0.22 | 0.02 | 0.04 | 0.09 | 0.07 | 0.04 | 0.11 |
| Aquimonas           | 0.00 | 0.03 | 0.03 | 0.07 | 0.02 | 0.00 | 0.13 | 0.02 | 0.04 | 0.00 | 0.11 | 0.02 | 0.04 | 0.00 |
| Thermomonas         | 0.00 | 0.00 | 0.11 | 0.00 | 0.00 | 0.00 | 0.08 | 0.20 | 0.07 | 0.02 | 0.07 | 0.09 | 0.00 | 0.05 |
| Stenotrophomonas    | 0.08 | 0.00 | 0.08 | 0.02 | 0.07 | 0.05 | 0.08 | 0.35 | 0.29 | 0.09 | 0.04 | 0.02 | 0.08 | 0.07 |
| Pseudoxanthomonas   | 0.00 | 0.00 | 0.05 | 0.00 | 0.02 | 0.03 | 0.05 | 0.00 | 0.00 | 0.00 | 0.07 | 0.05 | 0.04 | 0.07 |
| Arenimonas          | 0.02 | 0.45 | 0.05 | 0.05 | 0.12 | 0.65 | 1.64 | 0.07 | 0.09 | 0.58 | 0.27 | 0.23 | 0.04 | 0.09 |
| Aeromonas           | 0.02 | 0.03 | 0.19 | 0.00 | 0.05 | 0.05 | 0.03 | 0.00 | 0.00 | 0.00 | 0.00 | 0.02 | 0.04 | 0.00 |
| Tolomonas           | 0.00 | 0.00 | 0.05 | 0.00 | 0.05 | 0.00 | 0.08 | 0.00 | 0.00 | 0.00 | 0.00 | 0.00 | 0.00 | 0.00 |
| Succinivibrio       | 0.00 | 0.00 | 0.03 | 0.00 | 0.00 | 0.00 | 0.00 | 0.00 | 0.00 | 0.00 | 0.00 | 0.00 | 0.00 | 0.00 |
| Haliaea             | 0.04 | 0.03 | 0.03 | 0.67 | 0.15 | 0.00 | 0.20 | 0.00 | 0.20 | 0.00 | 0.02 | 0.07 | 0.00 | 0.07 |
| Methylocaldum       | 0.00 | 0.00 | 0.03 | 0.00 | 0.00 | 0.00 | 0.00 | 0.00 | 0.07 | 0.16 | 0.02 | 0.00 | 0.04 | 0.02 |
| Methylosarcina      | 0.00 | 0.00 | 0.00 | 0.00 | 0.00 | 0.00 | 0.00 | 0.00 | 0.00 | 0.00 | 0.00 | 0.02 | 0.00 | 0.00 |
| Methylomonas        | 0.63 | 0.00 | 0.08 | 0.07 | 0.00 | 0.00 | 0.00 | 0.00 | 0.04 | 0.00 | 0.02 | 0.05 | 0.00 | 0.02 |
| Methylobacter       | 0.02 | 0.00 | 0.03 | 0.63 | 0.00 | 0.03 | 0.05 | 0.00 | 0.00 | 0.02 | 0.04 | 0.05 | 0.00 | 0.00 |
| Methylococcus       | 0.06 | 0.03 | 0.03 | 0.00 | 0.00 | 0.00 | 0.00 | 0.09 | 0.34 | 0.29 | 0.02 | 0.11 | 0.19 | 0.16 |
| Caedibacter         | 0.02 | 0.00 | 0.00 | 0.25 | 0.02 | 0.00 | 0.00 | 0.02 | 0.02 | 0.00 | 0.04 | 0.05 | 0.11 | 0.02 |
| Thiothrix           | 0.00 | 0.03 | 0.03 | 0.28 | 0.10 | 0.00 | 0.03 | 0.02 | 0.09 | 0.02 | 0.00 | 0.09 | 0.08 | 0.09 |
| GpIIa               | 0.08 | 0.00 | 0.16 | 0.00 | 0.00 | 0.00 | 0.00 | 0.00 | 0.00 | 0.02 | 0.02 | 0.00 | 0.00 | 0.00 |
| GpXIII              | 0.04 | 0.00 | 0.03 | 0.05 | 0.00 | 0.03 | 0.00 | 0.00 | 0.00 | 0.00 | 0.00 | 0.00 | 0.00 | 0.00 |
| GpXI                | 0.00 | 0.00 | 0.00 | 0.00 | 0.00 | 0.00 | 0.03 | 0.00 | 0.00 | 0.00 | 0.00 | 0.00 | 0.00 | 0.00 |
| GpIV                | 0.02 | 0.00 | 0.00 | 0.00 | 0.00 | 0.00 | 0.00 | 0.00 | 0.00 | 0.00 | 0.00 | 0.00 | 0.00 | 0.00 |
| Bacillariophyta     | 0.33 | 0.00 | 0.00 | 0.00 | 0.00 | 0.00 | 0.00 | 0.00 | 0.00 | 0.00 | 0.00 | 0.00 | 0.02 | 0.07 |
| Streptophyta        | 0.00 | 0.03 | 0.00 | 0.00 | 0.00 | 0.00 | 0.00 | 0.00 | 0.02 | 0.00 | 0.00 | 0.00 | 0.00 | 0.00 |
| Armatimonadetes_gp5 | 0.58 | 0.10 | 0.38 | 0.02 | 0.10 | 0.14 | 0.25 | 0.67 | 0.98 | 0.42 | 0.36 | 0.43 | 0.28 | 0.57 |

|                                  |       |       |       |      |      |      |      |       |       |       |      |      |      |      |
|----------------------------------|-------|-------|-------|------|------|------|------|-------|-------|-------|------|------|------|------|
| Armatimonadetes_gp2              | 0.00  | 0.00  | 0.03  | 0.00 | 0.00 | 0.00 | 0.03 | 0.02  | 0.00  | 0.07  | 0.07 | 0.11 | 0.15 | 0.16 |
| Chthonomonas/Armatimonadetes_gp3 | 0.00  | 0.00  | 0.03  | 0.00 | 0.00 | 0.00 | 0.03 | 0.00  | 0.00  | 0.00  | 0.00 | 0.00 | 0.00 | 0.00 |
| Armatimonas/Armatimonadetes_gp1  | 0.08  | 0.03  | 0.11  | 0.00 | 0.00 | 0.03 | 0.00 | 0.00  | 0.02  | 0.09  | 0.04 | 0.00 | 0.02 | 0.07 |
| Kosmotoga                        | 0.00  | 0.00  | 0.00  | 0.00 | 0.00 | 0.00 | 0.00 | 0.00  | 0.04  | 0.00  | 0.00 | 0.00 | 0.02 | 0.00 |
| Nitrospira                       | 0.10  | 0.25  | 0.03  | 0.02 | 0.00 | 0.05 | 0.13 | 0.00  | 0.02  | 0.13  | 0.09 | 0.16 | 0.15 | 0.16 |
| Gemmatimonas                     | 0.29  | 2.03  | 0.80  | 0.25 | 0.15 | 0.65 | 1.67 | 0.02  | 0.11  | 0.16  | 0.16 | 0.34 | 0.38 | 0.25 |
| Ignavibacterium                  | 0.06  | 0.85  | 0.11  | 0.42 | 0.56 | 0.08 | 1.31 | 0.11  | 3.35  | 2.10  | 0.96 | 0.63 | 0.74 | 1.09 |
| Gp23                             | 0.00  | 0.00  | 0.00  | 0.00 | 0.00 | 0.00 | 0.00 | 0.00  | 0.00  | 0.02  | 0.00 | 0.00 | 0.00 | 0.00 |
| Gp22                             | 0.00  | 0.00  | 0.00  | 0.00 | 0.00 | 0.00 | 0.00 | 0.00  | 0.00  | 0.00  | 0.00 | 0.00 | 0.00 | 0.02 |
| Gp4                              | 19.39 | 28.27 | 16.95 | 1.09 | 3.62 | 2.27 | 4.30 | 10.87 | 20.78 | 19.67 | 7.41 | 9.16 | 7.58 | 7.56 |
| Bryobacter                       | 0.00  | 0.00  | 0.00  | 0.00 | 0.00 | 0.00 | 0.00 | 0.00  | 0.00  | 0.02  | 0.00 | 0.00 | 0.00 | 0.00 |
| Gp3                              | 0.29  | 0.00  | 0.14  | 0.05 | 0.20 | 0.19 | 0.05 | 0.06  | 0.00  | 0.45  | 0.07 | 0.14 | 0.11 | 0.09 |
| Edaphobacter                     | 0.00  | 0.05  | 0.00  | 0.00 | 0.00 | 0.00 | 0.00 | 0.00  | 0.00  | 0.00  | 0.00 | 0.00 | 0.00 | 0.00 |
| Gp1                              | 0.00  | 0.08  | 0.00  | 0.00 | 0.00 | 0.00 | 0.00 | 0.00  | 0.00  | 0.00  | 0.00 | 0.00 | 0.00 | 0.00 |
| Gp7                              | 0.00  | 0.10  | 0.05  | 0.05 | 0.02 | 0.00 | 0.40 | 0.06  | 9.21  | 0.02  | 0.36 | 0.43 | 0.30 | 0.09 |
| Gp6                              | 1.80  | 6.73  | 3.13  | 0.81 | 0.64 | 1.62 | 1.84 | 0.61  | 2.33  | 1.65  | 1.02 | 1.08 | 1.21 | 1.04 |
| Geothrix                         | 0.13  | 0.00  | 0.05  | 0.00 | 0.05 | 0.11 | 0.00 | 0.13  | 0.29  | 0.11  | 0.00 | 0.02 | 0.04 | 0.11 |
| Holophaga                        | 0.00  | 0.00  | 0.05  | 0.00 | 0.02 | 0.00 | 0.05 | 0.00  | 0.04  | 0.00  | 0.02 | 0.00 | 0.02 | 0.00 |
| Gp17                             | 1.67  | 3.85  | 0.91  | 0.51 | 1.10 | 0.54 | 1.39 | 0.28  | 0.96  | 0.80  | 0.51 | 0.70 | 0.42 | 0.38 |
| Gp16                             | 0.00  | 0.00  | 0.00  | 0.00 | 0.00 | 0.00 | 0.00 | 0.00  | 0.00  | 0.02  | 0.07 | 0.05 | 0.06 | 0.09 |
| Gp10                             | 0.15  | 0.33  | 1.24  | 0.58 | 0.05 | 0.00 | 1.74 | 0.31  | 1.90  | 0.60  | 0.31 | 0.36 | 0.34 | 0.23 |
| Gp18                             | 0.00  | 0.00  | 0.00  | 0.00 | 0.00 | 0.00 | 0.00 | 0.00  | 0.00  | 0.00  | 0.02 | 0.00 | 0.00 | 0.00 |
| Dethiobacter                     | 0.00  | 0.00  | 0.00  | 0.00 | 0.00 | 0.00 | 0.00 | 0.00  | 0.00  | 0.00  | 0.02 | 0.00 | 0.00 | 0.00 |
| Proteiniborus                    | 0.00  | 0.00  | 0.00  | 0.00 | 0.00 | 0.00 | 0.00 | 0.00  | 0.00  | 0.00  | 0.07 | 0.02 | 0.00 | 0.02 |
| Guggenheimella                   | 0.00  | 0.00  | 0.00  | 0.00 | 0.00 | 0.00 | 0.00 | 0.00  | 0.00  | 0.00  | 0.07 | 0.02 | 0.08 | 0.07 |
| Fusibacter                       | 0.56  | 0.10  | 0.11  | 0.07 | 0.10 | 0.03 | 0.03 | 0.00  | 0.02  | 0.00  | 0.16 | 0.05 | 0.08 | 0.07 |



|                                |      |      |      |      |      |      |      |      |      |      |      |      |      |      |
|--------------------------------|------|------|------|------|------|------|------|------|------|------|------|------|------|------|
| Blautia                        | 0.08 | 0.00 | 0.03 | 0.14 | 0.07 | 0.05 | 0.15 | 0.02 | 0.00 | 0.00 | 0.13 | 0.02 | 0.08 | 0.07 |
| Clostridium XIVb               | 0.00 | 0.00 | 0.05 | 0.00 | 0.00 | 0.00 | 0.00 | 0.00 | 0.00 | 0.00 | 0.02 | 0.05 | 0.04 | 0.02 |
| Howardella                     | 0.00 | 0.00 | 0.00 | 0.00 | 0.00 | 0.00 | 0.03 | 0.00 | 0.00 | 0.00 | 0.00 | 0.00 | 0.00 | 0.00 |
| Parasporobacterium             | 0.00 | 0.00 | 0.00 | 0.00 | 0.02 | 0.00 | 0.00 | 0.00 | 0.00 | 0.00 | 0.00 | 0.00 | 0.00 | 0.00 |
| Hespellia                      | 0.00 | 0.00 | 0.00 | 0.02 | 0.00 | 0.03 | 0.00 | 0.00 | 0.00 | 0.00 | 0.00 | 0.00 | 0.00 | 0.00 |
| Roseburia                      | 0.00 | 0.00 | 0.05 | 0.00 | 0.00 | 0.00 | 0.23 | 0.06 | 0.00 | 0.00 | 0.00 | 0.00 | 0.00 | 0.00 |
| Coprococcus                    | 0.00 | 0.00 | 0.00 | 0.00 | 0.00 | 0.00 | 0.10 | 0.00 | 0.00 | 0.00 | 0.00 | 0.00 | 0.00 | 0.00 |
| Lactonifactor                  | 0.00 | 0.00 | 0.00 | 0.00 | 0.00 | 0.00 | 0.03 | 0.00 | 0.00 | 0.00 | 0.00 | 0.00 | 0.00 | 0.00 |
| Butyrivibrio                   | 0.02 | 0.00 | 0.00 | 0.00 | 0.00 | 0.03 | 0.00 | 0.00 | 0.00 | 0.00 | 0.00 | 0.00 | 0.00 | 0.00 |
| Anaerostipes                   | 0.02 | 0.03 | 0.00 | 0.00 | 0.00 | 0.03 | 0.05 | 0.00 | 0.00 | 0.00 | 0.02 | 0.02 | 0.02 | 0.00 |
| Lachnospiraceae_incertae_sedis | 0.00 | 0.00 | 0.00 | 0.00 | 0.00 | 0.00 | 0.05 | 0.00 | 0.00 | 0.00 | 0.02 | 0.00 | 0.00 | 0.00 |
| Natronincola                   | 0.00 | 0.00 | 0.00 | 0.00 | 0.00 | 0.00 | 0.00 | 0.00 | 0.00 | 0.00 | 0.02 | 0.02 | 0.02 | 0.00 |
| Anoxynatronum                  | 0.00 | 0.00 | 0.00 | 0.00 | 0.00 | 0.00 | 0.00 | 0.00 | 0.00 | 0.00 | 0.02 | 0.00 | 0.00 | 0.00 |
| Tindallia                      | 0.02 | 0.00 | 0.00 | 0.00 | 0.00 | 0.00 | 0.00 | 0.00 | 0.00 | 0.00 | 0.00 | 0.00 | 0.00 | 0.00 |
| Alkaliphilus                   | 0.02 | 0.00 | 0.00 | 0.00 | 0.00 | 0.00 | 0.00 | 0.00 | 0.00 | 0.00 | 0.00 | 0.00 | 0.00 | 0.00 |
| Parvimonas                     | 0.00 | 0.00 | 0.00 | 0.00 | 0.00 | 0.00 | 0.00 | 0.00 | 0.00 | 0.00 | 0.00 | 0.00 | 0.00 | 0.02 |
| Gallicola                      | 0.00 | 0.00 | 0.00 | 0.00 | 0.00 | 0.00 | 0.00 | 0.00 | 0.00 | 0.00 | 0.04 | 0.02 | 0.02 | 0.00 |
| Soehngenia                     | 0.10 | 0.00 | 0.05 | 0.00 | 0.00 | 0.00 | 0.00 | 0.00 | 0.00 | 0.00 | 0.04 | 0.05 | 0.04 | 0.07 |
| Tissierella                    | 0.02 | 0.00 | 0.00 | 0.02 | 0.00 | 0.00 | 0.00 | 0.00 | 0.00 | 0.00 | 0.00 | 0.00 | 0.00 | 0.00 |
| Sedimentibacter                | 0.04 | 0.00 | 0.00 | 0.00 | 0.00 | 0.08 | 0.03 | 0.00 | 0.02 | 0.00 | 0.76 | 0.77 | 1.02 | 1.56 |
| Sporanaerobacter               | 0.02 | 0.00 | 0.00 | 0.00 | 0.00 | 0.00 | 0.00 | 0.00 | 0.00 | 0.00 | 0.02 | 0.00 | 0.00 | 0.00 |
| Tepidimicrobium                | 0.00 | 0.00 | 0.03 | 0.00 | 0.00 | 0.00 | 0.00 | 0.00 | 0.00 | 0.00 | 0.02 | 0.00 | 0.00 | 0.00 |
| Peptoniphilus                  | 0.06 | 0.00 | 0.00 | 0.00 | 0.00 | 0.00 | 0.00 | 0.00 | 0.00 | 0.00 | 0.00 | 0.00 | 0.00 | 0.00 |
| Anaerococcus                   | 0.08 | 0.00 | 0.00 | 0.00 | 0.00 | 0.00 | 0.00 | 0.00 | 0.00 | 0.00 | 0.09 | 0.00 | 0.00 | 0.00 |
| Syntrophomonas                 | 0.02 | 0.00 | 0.00 | 0.00 | 0.00 | 0.00 | 0.00 | 0.00 | 0.00 | 0.00 | 0.29 | 0.29 | 0.59 | 0.61 |
| Faecalibacterium               | 0.10 | 0.00 | 0.03 | 0.02 | 0.05 | 0.03 | 0.15 | 0.04 | 0.02 | 0.00 | 0.04 | 0.00 | 0.00 | 0.02 |

|                          |      |      |      |      |      |      |      |      |      |      |      |      |      |      |
|--------------------------|------|------|------|------|------|------|------|------|------|------|------|------|------|------|
| Acetivibrio              | 0.02 | 0.00 | 0.00 | 0.00 | 0.00 | 0.00 | 0.00 | 0.00 | 0.00 | 0.00 | 0.00 | 0.00 | 0.02 | 0.00 |
| Butyricicoccus           | 0.02 | 0.00 | 0.00 | 0.00 | 0.00 | 0.00 | 0.00 | 0.00 | 0.00 | 0.00 | 0.00 | 0.00 | 0.00 | 0.05 |
| Clostridium III          | 0.00 | 0.00 | 0.00 | 0.00 | 0.00 | 0.00 | 0.03 | 0.00 | 0.02 | 0.00 | 0.04 | 0.07 | 0.11 | 0.02 |
| Ethanoligenens           | 0.02 | 0.00 | 0.00 | 0.02 | 0.02 | 0.00 | 0.00 | 0.00 | 0.00 | 0.00 | 0.00 | 0.00 | 0.00 | 0.00 |
| Hydrogenoanaerobacterium | 0.00 | 0.00 | 0.00 | 0.02 | 0.00 | 0.00 | 0.00 | 0.00 | 0.00 | 0.00 | 0.00 | 0.00 | 0.00 | 0.00 |
| Ruminococcus             | 0.13 | 0.00 | 0.00 | 0.09 | 0.05 | 0.05 | 0.30 | 0.06 | 0.04 | 0.00 | 0.00 | 0.00 | 0.00 | 0.05 |
| Oscillibacter            | 0.08 | 0.00 | 0.05 | 0.00 | 0.05 | 0.05 | 0.05 | 0.00 | 0.02 | 0.00 | 0.00 | 0.02 | 0.02 | 0.00 |
| Clostridium IV           | 0.13 | 0.00 | 0.05 | 0.05 | 0.05 | 0.03 | 0.03 | 0.02 | 0.00 | 0.00 | 0.02 | 0.07 | 0.00 | 0.02 |
| Flavonifractor           | 0.00 | 0.00 | 0.00 | 0.00 | 0.00 | 0.03 | 0.05 | 0.02 | 0.00 | 0.00 | 0.00 | 0.00 | 0.02 | 0.00 |
| Papillibacter            | 0.04 | 0.00 | 0.03 | 0.00 | 0.05 | 0.00 | 0.30 | 0.00 | 0.02 | 0.02 | 0.04 | 0.05 | 0.06 | 0.02 |
| Anaerotruncus            | 0.06 | 0.03 | 0.03 | 0.00 | 0.00 | 0.00 | 0.00 | 0.00 | 0.00 | 0.00 | 0.00 | 0.00 | 0.02 | 0.00 |
| Sporobacter              | 0.06 | 0.00 | 0.08 | 0.00 | 0.07 | 0.08 | 0.51 | 0.00 | 0.02 | 0.00 | 0.00 | 0.00 | 0.02 | 0.02 |
| Saccharofermentans       | 0.06 | 0.03 | 0.16 | 0.07 | 0.12 | 0.16 | 0.40 | 0.02 | 0.00 | 0.02 | 0.42 | 0.27 | 0.28 | 0.68 |
| Clostridium XII          | 0.00 | 0.00 | 0.00 | 0.00 | 0.00 | 0.00 | 0.00 | 0.00 | 0.00 | 0.02 | 0.00 | 0.00 | 0.00 | 0.00 |
| Eubacterium              | 0.04 | 0.00 | 0.00 | 0.00 | 0.00 | 0.00 | 0.00 | 0.00 | 0.00 | 0.00 | 0.02 | 0.07 | 0.08 | 0.11 |
| Pseudoramibacter         | 0.00 | 0.00 | 0.00 | 0.00 | 0.00 | 0.00 | 0.00 | 0.00 | 0.00 | 0.00 | 0.04 | 0.05 | 0.00 | 0.02 |
| Acetobacterium           | 0.02 | 0.00 | 0.00 | 0.00 | 0.00 | 0.00 | 0.03 | 0.00 | 0.00 | 0.00 | 0.04 | 0.02 | 0.06 | 0.05 |
| Anaerofustis             | 0.00 | 0.00 | 0.00 | 0.00 | 0.00 | 0.00 | 0.00 | 0.00 | 0.00 | 0.00 | 0.02 | 0.07 | 0.04 | 0.11 |
| Tepidibacter             | 0.00 | 0.00 | 0.00 | 0.00 | 0.00 | 0.00 | 0.00 | 0.00 | 0.00 | 0.00 | 0.02 | 0.00 | 0.02 | 0.00 |
| Peptostreptococcus       | 0.06 | 0.00 | 0.14 | 0.00 | 0.00 | 0.00 | 0.00 | 0.00 | 0.00 | 0.00 | 0.02 | 0.00 | 0.00 | 0.00 |
| Proteocatella            | 0.10 | 0.03 | 0.08 | 0.42 | 0.02 | 0.05 | 0.03 | 0.00 | 0.00 | 0.00 | 0.16 | 0.14 | 0.11 | 0.11 |
| Sporacetigenium          | 0.00 | 0.00 | 0.00 | 0.00 | 0.00 | 0.00 | 0.00 | 0.00 | 0.00 | 0.00 | 0.00 | 0.00 | 0.04 | 0.05 |
| Acetoanaerobium          | 0.19 | 0.00 | 0.11 | 0.16 | 0.07 | 0.03 | 0.23 | 0.00 | 0.02 | 0.02 | 0.31 | 0.38 | 0.30 | 0.45 |
| Clostridium XI           | 0.00 | 0.03 | 0.00 | 0.00 | 0.00 | 0.03 | 0.05 | 0.00 | 0.11 | 0.04 | 1.42 | 1.04 | 1.29 | 1.88 |
| Gracilibacter            | 0.00 | 0.00 | 0.00 | 0.00 | 0.00 | 0.00 | 0.00 | 0.00 | 0.00 | 0.00 | 0.00 | 0.00 | 0.00 | 0.02 |
| Lutispora                | 0.00 | 0.00 | 0.00 | 0.00 | 0.00 | 0.03 | 0.00 | 0.00 | 0.00 | 0.00 | 0.02 | 0.00 | 0.00 | 0.00 |





|                                      |      |      |      |       |       |       |       |      |      |      |      |      |      |      |
|--------------------------------------|------|------|------|-------|-------|-------|-------|------|------|------|------|------|------|------|
| Deinobacterium                       | 0.00 | 0.03 | 0.00 | 0.00  | 0.00  | 0.00  | 0.00  | 0.00 | 0.02 | 0.00 | 0.02 | 0.00 | 0.02 | 0.00 |
| Deinococcus                          | 0.00 | 0.00 | 0.00 | 0.00  | 0.02  | 0.00  | 0.00  | 0.00 | 0.00 | 0.00 | 0.00 | 0.00 | 0.02 | 0.05 |
| Truepera                             | 0.00 | 0.00 | 0.00 | 0.00  | 0.00  | 0.00  | 0.00  | 0.00 | 0.00 | 0.00 | 0.00 | 0.02 | 0.00 | 0.00 |
| Meiothermus                          | 0.00 | 0.00 | 0.00 | 0.00  | 0.05  | 0.00  | 0.00  | 0.04 | 0.00 | 0.00 | 0.00 | 0.00 | 0.00 | 0.00 |
| Thermus                              | 0.00 | 0.00 | 0.00 | 0.00  | 0.00  | 0.03  | 0.00  | 0.00 | 0.00 | 0.00 | 0.02 | 0.00 | 0.00 | 0.00 |
| Aminomonas                           | 0.00 | 0.00 | 0.03 | 0.00  | 0.00  | 0.03  | 0.00  | 0.04 | 0.02 | 0.02 | 0.02 | 0.09 | 0.00 | 0.02 |
| Pyramidobacter                       | 0.00 | 0.00 | 0.00 | 0.00  | 0.00  | 0.00  | 0.00  | 0.00 | 0.00 | 0.00 | 0.00 | 0.00 | 0.02 | 0.00 |
| Aminobacterium                       | 0.02 | 0.00 | 0.00 | 0.00  | 0.00  | 0.00  | 0.08  | 0.02 | 0.02 | 0.00 | 0.04 | 0.02 | 0.04 | 0.11 |
| Synergistes                          | 0.04 | 0.00 | 0.11 | 0.00  | 0.05  | 0.03  | 0.05  | 0.00 | 0.00 | 0.00 | 0.93 | 0.77 | 0.89 | 0.93 |
| Cloacibacillus                       | 0.17 | 0.08 | 0.19 | 0.14  | 0.20  | 0.14  | 0.15  | 0.09 | 0.02 | 0.11 | 0.16 | 0.23 | 0.17 | 0.36 |
| WS3_genera_incertae_sedis            | 0.19 | 0.40 | 0.30 | 0.00  | 0.00  | 0.08  | 0.45  | 0.00 | 0.04 | 0.02 | 0.18 | 0.27 | 0.11 | 0.18 |
| Subdivision5_genera_incertae_sedis   | 0.00 | 0.10 | 0.05 | 0.02  | 0.07  | 0.03  | 0.20  | 0.00 | 0.02 | 0.00 | 0.16 | 0.23 | 0.15 | 0.20 |
| Spartobacteria_genera_incertae_sedis | 0.02 | 0.53 | 0.00 | 0.21  | 0.10  | 0.11  | 0.56  | 0.04 | 1.25 | 0.11 | 0.16 | 0.14 | 0.11 | 0.05 |
| Xiphinematobacter                    | 0.02 | 0.00 | 0.00 | 0.12  | 0.02  | 0.00  | 0.00  | 0.00 | 0.00 | 0.00 | 0.00 | 0.02 | 0.02 | 0.00 |
| Cerasicoccus                         | 0.00 | 0.00 | 0.00 | 0.00  | 0.00  | 0.00  | 0.00  | 0.00 | 0.00 | 0.00 | 0.00 | 0.00 | 0.00 | 0.02 |
| Opitutus                             | 0.52 | 1.33 | 0.47 | 1.27  | 0.51  | 0.92  | 0.40  | 0.02 | 0.07 | 0.02 | 0.09 | 0.07 | 0.13 | 0.16 |
| Alterococcus                         | 0.00 | 0.00 | 0.03 | 0.00  | 0.00  | 0.00  | 0.00  | 0.00 | 0.00 | 0.00 | 0.00 | 0.00 | 0.04 | 0.00 |
| Luteolibacter                        | 0.00 | 0.05 | 0.00 | 0.00  | 0.02  | 0.03  | 0.00  | 0.00 | 0.00 | 0.00 | 0.02 | 0.00 | 0.00 | 0.00 |
| Verrucomicrobium                     | 0.10 | 1.58 | 0.19 | 0.02  | 0.05  | 0.05  | 0.05  | 0.00 | 6.93 | 1.47 | 0.33 | 0.56 | 0.44 | 0.61 |
| Prostheco bacter                     | 1.63 | 6.73 | 4.29 | 12.58 | 17.34 | 16.69 | 10.72 | 0.30 | 0.69 | 0.13 | 2.29 | 2.55 | 2.71 | 2.47 |
| Subdivision3_genera_incertae_sedis   | 8.93 | 7.31 | 5.27 | 5.10  | 4.03  | 4.24  | 4.02  | 0.15 | 3.98 | 1.45 | 1.56 | 1.44 | 1.61 | 1.40 |
| Schlesneria                          | 0.04 | 0.75 | 0.00 | 0.07  | 0.00  | 0.08  | 0.00  | 0.00 | 0.04 | 0.00 | 0.07 | 0.07 | 0.11 | 0.07 |
| Planctomyces                         | 0.27 | 0.45 | 0.38 | 0.51  | 0.07  | 0.05  | 0.33  | 0.13 | 0.40 | 0.22 | 0.60 | 0.59 | 0.28 | 0.48 |
| Gemmata                              | 0.17 | 0.63 | 0.44 | 0.07  | 0.02  | 0.95  | 0.18  | 0.11 | 0.38 | 0.51 | 0.33 | 0.29 | 0.17 | 0.25 |
| Rhodopirellula                       | 0.00 | 0.03 | 0.00 | 0.02  | 0.02  | 0.00  | 0.05  | 0.02 | 0.07 | 0.04 | 0.02 | 0.07 | 0.00 | 0.02 |
| Blastopirellula                      | 0.17 | 2.08 | 0.11 | 0.21  | 0.27  | 0.03  | 0.05  | 0.19 | 1.86 | 5.11 | 0.89 | 0.59 | 0.78 | 0.91 |

|                            |      |      |      |      |      |      |      |      |      |      |       |      |       |      |
|----------------------------|------|------|------|------|------|------|------|------|------|------|-------|------|-------|------|
| Zavarzinella               | 1.67 | 1.43 | 2.42 | 0.90 | 0.17 | 0.70 | 0.53 | 0.76 | 3.76 | 2.79 | 1.07  | 1.81 | 1.19  | 1.40 |
| Singulisphaera             | 0.00 | 0.00 | 0.05 | 0.00 | 0.00 | 0.00 | 0.08 | 0.04 | 0.11 | 0.02 | 0.00  | 0.02 | 0.08  | 0.07 |
| Phycisphaera               | 0.00 | 1.20 | 0.00 | 0.02 | 0.00 | 0.03 | 0.00 | 0.00 | 0.27 | 0.18 | 0.07  | 0.05 | 0.02  | 0.07 |
| OP11_genera_incertae_sedis | 0.00 | 0.00 | 0.00 | 0.00 | 0.00 | 0.00 | 0.00 | 0.00 | 0.00 | 0.07 | 0.00  | 0.02 | 0.02  | 0.02 |
| Victivallis                | 0.04 | 0.00 | 0.00 | 0.00 | 0.02 | 0.00 | 0.00 | 0.00 | 0.00 | 0.00 | 0.02  | 0.00 | 0.02  | 0.00 |
| Dehalogenimonas            | 0.00 | 0.00 | 0.03 | 0.00 | 0.00 | 0.00 | 0.00 | 0.00 | 0.00 | 0.02 | 0.00  | 0.00 | 0.00  | 0.00 |
| Levilinea                  | 0.00 | 0.00 | 0.14 | 0.00 | 0.05 | 0.00 | 0.10 | 0.04 | 0.00 | 1.34 | 3.65  | 3.63 | 5.33  | 5.00 |
| Leptolinea                 | 0.38 | 0.05 | 0.85 | 0.12 | 0.20 | 0.30 | 0.83 | 0.30 | 0.51 | 0.83 | 10.28 | 7.61 | 10.14 | 9.30 |
| Anaerolinea                | 0.06 | 0.00 | 0.63 | 0.21 | 0.10 | 0.00 | 1.44 | 0.72 | 0.20 | 5.65 | 0.89  | 0.79 | 0.74  | 0.88 |
| Longilinea                 | 0.21 | 0.05 | 1.21 | 0.65 | 1.17 | 0.16 | 2.86 | 1.02 | 0.69 | 4.51 | 1.31  | 1.42 | 1.12  | 1.56 |
| Bellilinea                 | 0.29 | 0.00 | 0.47 | 0.07 | 0.12 | 0.14 | 1.06 | 0.52 | 0.38 | 1.92 | 0.53  | 0.54 | 0.66  | 0.43 |
| Sphaerobacter              | 0.00 | 0.00 | 0.00 | 0.00 | 0.00 | 0.00 | 0.00 | 0.00 | 0.00 | 0.00 | 0.00  | 0.02 | 0.00  | 0.02 |
| Caldilinea                 | 0.35 | 0.53 | 1.37 | 1.44 | 3.00 | 0.49 | 0.48 | 0.33 | 0.83 | 3.57 | 1.76  | 1.90 | 1.80  | 2.53 |
| Neochlamydia               | 0.04 | 0.18 | 0.00 | 0.02 | 0.00 | 0.08 | 0.08 | 0.06 | 0.56 | 0.11 | 0.13  | 0.23 | 0.11  | 0.05 |
| Parachlamydia              | 0.69 | 0.45 | 0.38 | 0.74 | 0.44 | 0.73 | 0.33 | 0.07 | 0.67 | 1.81 | 0.33  | 0.56 | 0.44  | 0.57 |
| Simkania                   | 0.21 | 0.20 | 0.11 | 0.00 | 0.05 | 0.00 | 0.03 | 0.00 | 0.20 | 0.09 | 0.04  | 0.05 | 0.13  | 0.09 |
| SR1_genera_incertae_sedis  | 0.04 | 0.00 | 0.00 | 0.05 | 0.12 | 0.05 | 0.03 | 0.00 | 0.02 | 0.02 | 0.04  | 0.02 | 0.02  | 0.05 |
| Methanobrevibacter         | 0.00 | 0.00 | 0.00 | 0.00 | 0.00 | 0.00 | 0.00 | 0.02 | 0.00 | 0.02 | 0.00  | 0.00 | 0.00  | 0.00 |
| Methanobacterium           | 0.00 | 0.00 | 0.00 | 0.00 | 0.00 | 0.00 | 0.00 | 0.00 | 0.00 | 0.00 | 0.00  | 0.00 | 0.00  | 0.02 |
| Methanosaeta               | 0.02 | 0.00 | 0.00 | 0.00 | 0.00 | 0.00 | 0.00 | 0.00 | 0.00 | 0.00 | 0.04  | 0.02 | 0.11  | 0.09 |
| Methanospirillum           | 0.08 | 0.05 | 0.05 | 0.07 | 0.00 | 0.03 | 0.05 | 0.00 | 0.07 | 0.07 | 0.04  | 0.07 | 0.17  | 0.16 |
| Methanosphaerula           | 0.00 | 0.00 | 0.00 | 0.00 | 0.00 | 0.00 | 0.00 | 0.00 | 0.00 | 0.02 | 0.02  | 0.00 | 0.00  | 0.09 |
| Methanocorpusculum         | 0.00 | 0.00 | 0.00 | 0.00 | 0.02 | 0.00 | 0.00 | 0.00 | 0.00 | 0.00 | 0.00  | 0.00 | 0.00  | 0.00 |
| Methanoregula              | 0.00 | 0.00 | 0.00 | 0.00 | 0.00 | 0.03 | 0.00 | 0.02 | 0.00 | 0.11 | 0.02  | 0.00 | 0.00  | 0.02 |
| Methanolinea               | 0.02 | 0.00 | 0.03 | 0.00 | 0.00 | 0.00 | 0.00 | 0.04 | 0.00 | 0.04 | 0.02  | 0.02 | 0.08  | 0.02 |

Table S6 Rare genera within each sample.

| WWTP | Genus                                                                                                                                                                                                                                                                                                                                                                             |
|------|-----------------------------------------------------------------------------------------------------------------------------------------------------------------------------------------------------------------------------------------------------------------------------------------------------------------------------------------------------------------------------------|
| A1   | <i>Rubrobacter</i> , <i>Humihabitans</i> , <i>Larkinella</i> , <i>Pelobacter</i> , <i>Oligella</i> , <i>Uruburuella</i> ,<br><i>Hansschlegelia</i> , <i>Methylovirgula</i> , <i>Gp18</i> , <i>Dethiobacter</i> , <i>Proteiniclasticum</i> ,<br><i>Anoxynatronum</i> , <i>Alkalibacterium</i>                                                                                      |
| A2   | <i>Knoellia</i> , <i>Saxeibacter</i> , <i>Prolixibacter</i> , <i>Amaricoccus</i> , <i>Salinihabitans</i> , <i>Thioalkalibacter</i> ,<br><i>Methylosarcina</i> , <i>Propionispira</i> , <i>Truepera</i>                                                                                                                                                                            |
| B    | <i>Herbiconiux</i> , <i>Anaerorhabdus</i> , <i>Hydrotalea</i> , <i>Nisaea</i> , <i>Pontibaca</i> , <i>Rheinheimera</i> ,<br><i>Schwartzia</i> , <i>Gelria</i> , <i>Pyramidobacter</i>                                                                                                                                                                                             |
| C    | <i>Caldisericum</i> , <i>Pseudonocardia</i> , <i>Cryobacterium</i> , <i>Paraeggerthella</i> , <i>Vitellibacter</i> , <i>Gp22</i> ,<br><i>Dehalobacter</i> , <i>Parvimonas</i> , <i>Gracilibacter</i> , <i>Cerasicoccus</i> , <i>Methanobacterium</i>                                                                                                                              |
| D1   | <i>Paraprevotella</i> , <i>Wolinella</i> , <i>Campylobacter</i> , <i>Desulfatirhabdium</i> , <i>Aquaspirillum</i> ,<br><i>Azotobacter</i> , <i>GpIV</i> , <i>Tindallia</i> , <i>Alkaliphilus</i> , <i>Peptoniphilus</i> , <i>Dolosigranulum</i>                                                                                                                                   |
| D2   | <i>Propionigenium</i> , <i>Fodinibacter</i> , <i>Sporichthya</i> , <i>Rhodococcus</i> , <i>Marinifilum</i> , <i>Tannerella</i> ,<br><i>Tepidiphilus</i> , <i>Brucella</i> , <i>Saccharococcus</i> , <i>Gemella</i>                                                                                                                                                                |
| E1   | <i>Soonwooa</i> , <i>Alcaligenes</i> , <i>Massilia</i> , <i>Sulfuricella</i> , <i>Gulbenkiania</i> , <i>Agromonas</i> , <i>Maribius</i> ,<br><i>Arenicella</i> , <i>Escherichia/Shigella</i>                                                                                                                                                                                      |
| E2   | <i>Cystobacter</i> , <i>Gp23</i> , <i>Bryobacter</i> , <i>Peptococcus</i> , <i>Acidaminococcus</i> , <i>Clostridium XII</i> ,<br><i>Marinilactibacillus</i>                                                                                                                                                                                                                       |
| F    | <i>Odoribacter</i> , <i>Flavitalea</i> , <i>Acidiphilium</i> , <i>Thiohalomonas</i> , <i>Psychrobacter</i> , <i>Edaphobacter</i> ,<br><i>Gp1</i>                                                                                                                                                                                                                                  |
| G1   | <i>Sanguibacter</i> , <i>Morganella</i> , <i>Klebsiella</i> , <i>Succinivibrio</i>                                                                                                                                                                                                                                                                                                |
| G2   | <i>Leptonema</i> , <i>Leadbetterella</i> , <i>Marivirga</i> , <i>Nubsella</i> , <i>Sulfurovum</i> , <i>Pyxidicoccus</i> ,<br><i>Rivibacter</i> , <i>Erythrobacter</i> , <i>Acidicaldus</i> , <i>Dokdonella</i> , <i>Hydrogenoanaerobacterium</i><br><i>Butyricimonas</i> , <i>Bordetella</i> , <i>Duganella</i> , <i>Orientia</i> , <i>Sandaracinobacter</i> , <i>Salipiger</i> , |
| H    | <i>Cronobacter</i> , <i>Phascolarctobacterium</i> , <i>Robinsoniella</i> , <i>Parasporobacterium</i> ,<br><i>Pediococcus</i>                                                                                                                                                                                                                                                      |
| I    | <i>Serinibacter</i> , <i>Caldimonas</i> , <i>Uliginosibacterium</i> , <i>Anaplasma</i> , <i>Pseudofulvimonas</i> , <i>GpXI</i> ,<br><i>Clostridium XIVa</i> , <i>Howardella</i> , <i>Coprococcus</i> , <i>Lactonifactor</i>                                                                                                                                                       |
| J    | <i>Xylanibacter</i> , <i>Empedobacter</i> , <i>Leptothrix</i> , <i>Malikia</i> , <i>Xenophilus</i> , <i>Pelosinus</i>                                                                                                                                                                                                                                                             |

Figure S1

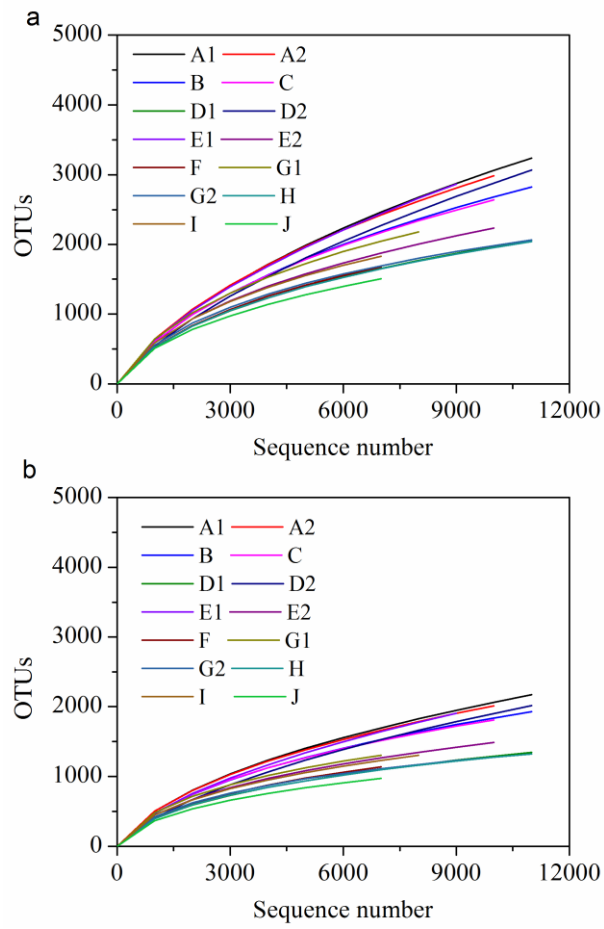

Figure S2

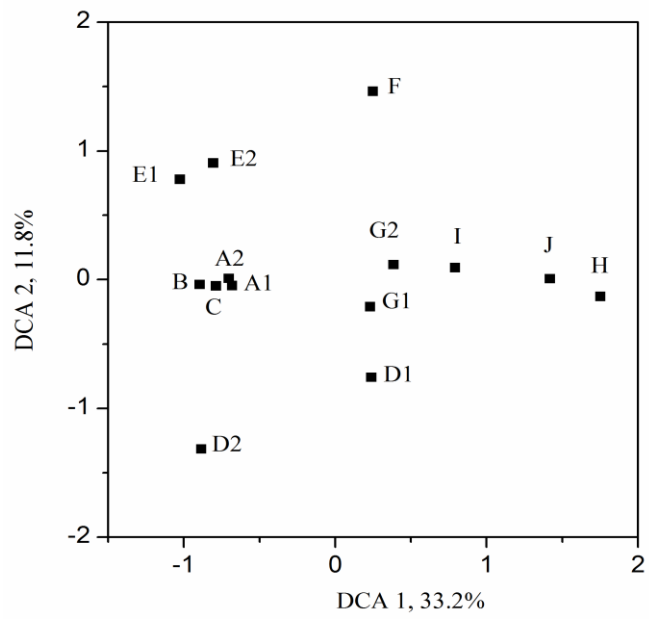



Figure S4

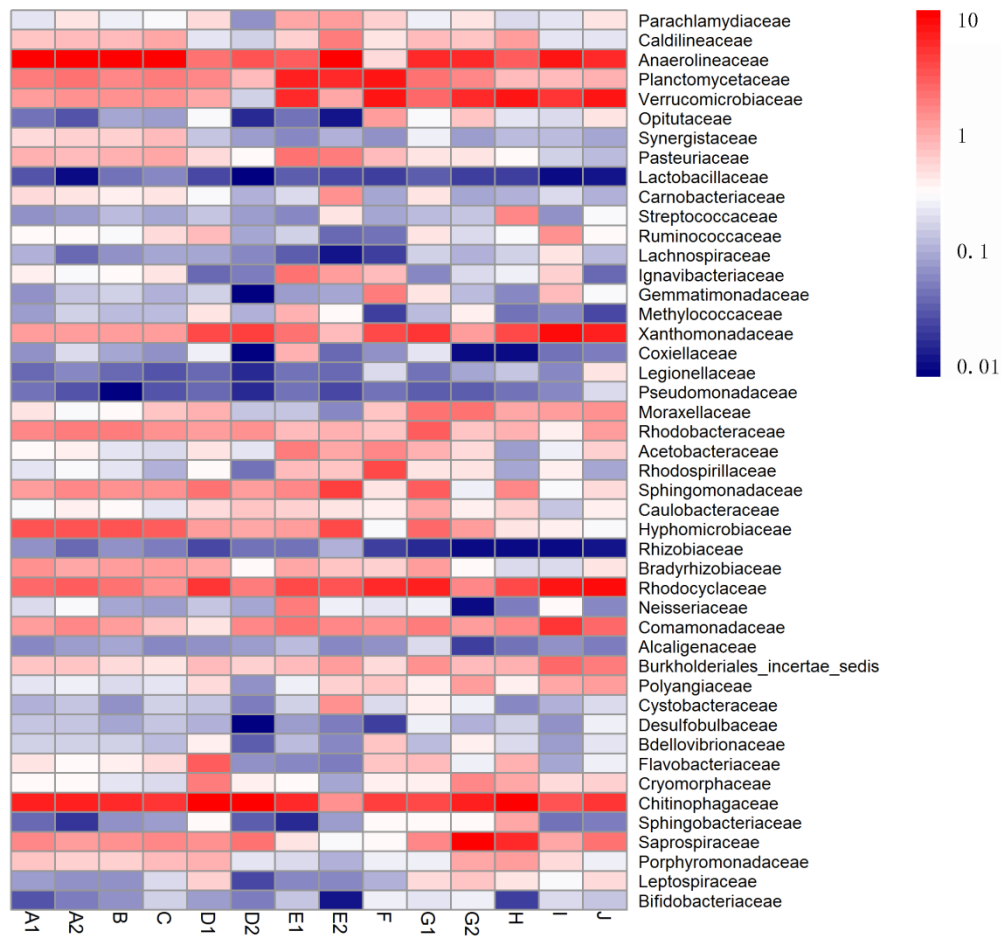

Supplement: AEM.01617-12_zam999103704so1.pdf [file AEM.01617-12_zam999103704so1.pdf]
